# Supplementary material
Source: PubMed Central journal article supplement (PMC2760080)
Supplement: NIHMS72314-supplement-1.pdf [file NIHMS72314-supplement-1.pdf]

**Identification of Protein Targets of 4-Hydroxynonenal Using Click  
Chemistry for Ex Vivo Biotinylation of Azido and Alkynyl Derivatives**

Andrew Vila<sup>1†</sup>, Keri A. Tallman<sup>2†</sup>, Aaron T. Jacobs<sup>1</sup>, Daniel C. Liebler<sup>2,3</sup>, Ned A.  
Porter<sup>1,2</sup>, and Lawrence J. Marnett<sup>1,2,3\*</sup>

Departments of Biochemistry<sup>1</sup>, Chemistry<sup>2</sup>, and Pharmacology<sup>3</sup>  
Vanderbilt Institute of Chemical Biology  
Center in Molecular Toxicology  
Vanderbilt-Ingram Cancer Center  
Vanderbilt University  
Nashville TN 37232

Supporting Information

to

“HNE Protein Targets”

Andrew Vila et al.

Supporting Tables 1-3

Supporting Figure 1-3

Table S1. Proteins identified with Az-HNE treatment of RKO cells (150  $\mu$ g of lysate protein). Displayed are the % sequence coverages for 5, 10, and 50  $\mu$ M Az-HNE treated cells.

| PROTEIN                                             | ACCESSION      | Az-HNE     |            |           |
|-----------------------------------------------------|----------------|------------|------------|-----------|
|                                                     |                | 50 $\mu$ M | 10 $\mu$ M | 5 $\mu$ M |
| 14-3-3 protein epsilon                              | IPI00000816.1  | 22         | 18         | -         |
| 14-3-3 protein theta                                | IPI00018146.1  | 16         | 18         | -         |
| 14-3-3 protein zeta/delta                           | IPI00021263.3  | 23         | -          | -         |
| 16 kDa protein                                      | IPI00005589.1  | -          | 27         | -         |
| 29 kDa protein                                      | IPI00015139.3  | 17         | -          | -         |
| 39 kDa protein                                      | IPI00334627.2  | 28         | -          | -         |
| 40S ribosomal protein S2                            | IPI00013485.3  | 12         | -          | -         |
| 40S ribosomal protein S3                            | IPI00011253.2  | 41         | 33         | -         |
| 40S ribosomal protein S8                            | IPI00216587.8  | -          | 19         | -         |
| 40S ribosomal protein S4, X isoform                 | IPI00217030.9  | 17         | -          | -         |
| 40S ribosomal protein S7                            | IPI00013415.1  | 23         | -          | -         |
| 60 kDa heat shock protein, mitochondrial precursor  | IPI00472102.2  | 22         | 10         | 8         |
| 60S acidic ribosomal protein P0                     | IPI00008530.1  | 23         | -          | -         |
| 60S ribosomal protein L18a                          | IPI00026202.1  | -          | 21         | 21        |
| 60S ribosomal protein L21                           | IPI00247583.4  | -          | 28         | -         |
| 60S ribosomal protein L27                           | IPI00219155.4  | -          | 32         | -         |
| 60S ribosomal protein L30                           | IPI00219156.6  | -          | 35         | -         |
| 60S ribosomal protein L6                            | IPI00329389.5  | -          | 10         | -         |
| 60S ribosomal protein L4                            | IPI00003918.4  | 10         | -          | -         |
| 60S ribosomal protein L9                            | IPI00031691.1  | 22         | -          | -         |
| 78 kDa glucose-regulated protein precursor          | IPI00003362.1  | 17         | 23         | 7         |
| ADP-ribosylation factor 1                           | IPI00215914.4  | -          | 20         | -         |
| ADP/ATP translocase 2                               | IPI00007188.4  | 15         | -          | -         |
| ALB protein                                         | IPI00022434.2  | 26         | -          | -         |
| ATP synthase alpha chain, mitochondrial precursor   | IPI00440493.2  | 9          | 6          | -         |
| Actin, aortic smooth muscle                         | IPI00008603.1  | 16         | 8          | -         |
| Alpha-actinin-1                                     | IPI00013508.4  | 10         | -          | -         |
| Alpha-enolase                                       | IPI00465248.4  | 12         | 16         | -         |
| Alpha-enolase, lung specific                        | IPI00013769.1  | 12         | 12         | 10        |
| Annexin A5                                          | IPI00329801.11 | 18         | 9          | -         |
| Aspartate aminotransferase, mitochondrial precursor | IPI00018206.3  | 8          | 10         | -         |
| Chloride intracellular channel protein 1            | IPI00010896.2  | 32         | -          | -         |
| EEF1A1 protein                                      | IPI00025447.6  | 11         | -          | -         |
| ELAV-like protein 1                                 | IPI00301936.3  | 14         | -          | -         |
| Elongation factor 1-delta                           | IPI00023048.3  | 16         | -          | -         |
| Elongation factor 1-gamma                           | IPI00000875.5  | 8          | -          | -         |

|                                                 |                |     |     |    |
|-------------------------------------------------|----------------|-----|-----|----|
| Elongation factor 2                             | IPI00186290.5  | 16  | 7   | -  |
| Elongation factor Tu, mitochondrial precursor   | IPI00027107.4  | 10  | -   | -  |
| Endoplasmic precursor                           | IPI00027230.3  | 5   | 6   | -  |
| Eukaryotic initiation factor 4A-I               | IPI00025491.1  | 9   | 8   | -  |
| Extracellular glycoprotein lacritin precursor   | IPI00020487.1  | -   | -   | 23 |
| Far upstream element-binding protein 2          | IPI00298363.2  | 8   | 5   | 5  |
| Filamin A, alpha                                | IPI00302592.2  | 3   | -   | -  |
| Fructose-bisphosphate aldolase A                | IPI00465439.4  | 26  | 14  | -  |
| GTP-binding nuclear protein RAN                 | IPI00012507.3  | 23  | 19  | -  |
| Glutathione S-transferase P                     | IPI00219757.12 | 36  | 23  | -  |
| HNRPA2B1 protein                                | IPI00386854.5  | 14  | -   | -  |
| Heat shock 70 kDa protein 1                     | IPI00304925.3  | 9   | -   | -  |
| Heat shock 70 kDa protein 1L                    | IPI00301277.1  | 7   | -   | -  |
| Heat shock 70 kDa protein 4                     | IPI00002966.1  | 8   | 7   | -  |
| Heat shock protein HSP 90-alpha 2               | IPI00382470.2  | 6.2 | 3   | -  |
| Hypothetical protein DKFZp761K0511              | IPI00334775.5  | 18  | 13  | 5  |
| Keratin 5b                                      | IPI00166205.2  | 9   | 6.1 | -  |
| Keratin, type II cuticular Hb4                  | IPI00300052.1  | -   | -   | 9  |
| Keratin, type II cytoskeletal 3                 | IPI00290857.2  | 4   | -   | -  |
| Keratin, type II cytoskeletal 4                 | IPI00290078.2  | 6   | 9   | -  |
| L-lactate dehydrogenase B chain                 | IPI00219217.2  | 28  | 18  | -  |
| Malate dehydrogenase, mitochondrial precursor   | IPI00291006.1  | 36  | 16  | -  |
| Multifunctional protein ADE2                    | IPI00217223.1  | 10  | -   | -  |
| Nucleoside diphosphate kinase A                 | IPI00012048.1  | -   | 38  | -  |
| ORF protein                                     | IPI00171903.1  | 9   | -   | -  |
| Peptidyl-prolyl cis-trans isomerase B precursor | IPI00646304.2  | -   | 18  | -  |
| PREDICTED: KIAA1765 protein                     | IPI00028196.4  | 2   | -   | -  |
| PREDICTED: similar to ribosomal protein L7      | IPI00018680.5  | 6   | -   | -  |
| Peroxiredoxin-1                                 | IPI00000874.1  | 39  | 37  | 16 |
| Peroxiredoxin-6                                 | IPI00220301.4  | -   | 16  | -  |
| Phosphatidylethanolamine-binding protein        | IPI00219446.4  | 20  | 31  | -  |
| Phosphoglycerate kinase 1                       | IPI00169383.2  | 21  | -   | -  |
| Plastin-2                                       | IPI00010471.3  | 16  | -   | -  |
| Poly(rC)-binding protein 1                      | IPI00016610.2  | 14  | -   | -  |
| Profilin-1                                      | IPI00216691.4  | -   | 50  | 40 |
| Prohibitin-2                                    | IPI00027252.6  | 20  | 14  | -  |
| Proliferating cell nuclear antigen              | IPI00021700.3  | 17  | -   | -  |
| Proliferation-associated protein 2G4            | IPI00299000.3  | -   | 15  | -  |
| Proliferation-inducing gene 21                  | IPI00552496.1  | 24  | 23  | -  |
| Protein disulfide-isomerase A3 precursor        | IPI00025252.1  | 7   | -   | -  |
| Purine nucleoside phosphorylase                 | IPI00017672.3  | 18  | -   | -  |
| Ras-related protein Rab-7                       | IPI00016342.1  | 18  | -   | -  |
| RcTPI1 (Fragment)                               | IPI00383071.1  | 27  | 32  | -  |

|                                                               |               |    |    |    |
|---------------------------------------------------------------|---------------|----|----|----|
| Ribosomal pRotein L15; 60S Ribosomal pRotein L15              | IPI00375511.4 | -  | 15 | -  |
| S-methyl-5-thioadenosine phosphorylase                        | IPI00011876.1 | 17 | -  | -  |
| Serine hydroxymethyltransferase, mitochondrial precursor      | IPI00002520.1 | 7  | -  | -  |
| Splice Isoform 1 of Heterogeneous nuclear ribonucleoprotein   | IPI00216049.1 | 25 | -  | -  |
| Splice Isoform 1 of Polyadenylate-binding protein 1           | IPI00008524.1 | 10 | -  | -  |
| Splice Isoform 1 of 60S ribosomal protein L11                 | IPI00219150.5 | -  | 18 | -  |
| Splice Isoform 1 of Voltage-dependent anion-selective chann   | IPI00031804.1 | 12 | 12 | -  |
| Splice Isoform B1 of Heterogeneous nuclear ribonucleoprotein  | IPI00396378.3 | -  | 14 | -  |
| Splice Isoform Long of Heterogenous nuclear ribonucleoprotein | IPI00025054.1 | -  | 7  | -  |
| Stress-70 protein, mitochondrial precursor                    | IPI00007765.5 | 25 | 10 | 8  |
| Stress-induced-phosphoprotein 1                               | IPI00013894.1 | 6  | -  | -  |
| T-complex protein 1 subunit alpha                             | IPI00290566.1 | 8  | -  | -  |
| T-complex protein 1 subunit beta                              | IPI00297779.6 | 8  | -  | -  |
| T-complex protein 1 subunit theta                             | IPI00302925.3 | 8  | -  | -  |
| TUBA6 protein                                                 | IPI00166768.2 | 20 | 12 | 13 |
| Thioredoxin-dependent peroxide reductase, mitochondrial pre   | IPI00024919.3 | 15 | -  | -  |
| Transferrin receptor protein 1                                | IPI00022462.1 | 5  | -  | -  |
| Transitional endoplasmic reticulum ATPase                     | IPI00022774.2 | 4  | -  | -  |
| Tubulin alpha-1 chain                                         | IPI00007750.1 | 19 | -  | -  |
| Tubulin beta-1 chain                                          | IPI00006510.1 | 4  | -  | -  |
| Tubulin beta-2 chain                                          | IPI00011654.2 | 13 | -  | -  |
| Tubulin beta-2C chain                                         | IPI00007752.1 | 27 | 22 | 8  |
| Ubiquitin-activating enzyme E1                                | IPI00026119.6 | 9  | -  | -  |
| Ubiquitin-activating enzyme E1                                | IPI00645078.1 | 5  | -  | -  |
| chaperonin containing TCP1, subunit 3 isoform b               | IPI00290770.3 | 9  | -  | -  |
| heterogeneous nuclear ribonucleoprotein D-like                | IPI00011274.1 | 6  | -  | -  |
| keratin 1B                                                    | IPI00376379.2 | 7  | -  | -  |
| lactate dehydrogenase A                                       | IPI00217966.6 | 16 | 9  | -  |
| poly(rC)-binding protein 2 isoform b                          | IPI00012066.1 | 19 | 16 | -  |
| pyruvate kinase 3 isoform 2                                   | IPI00220644.6 | 58 | 18 | 10 |

Table S2. Proteins identified with AI-HNE treatment of RKO cells (2 mg of cellular lysate protein). Displayed from left to right are the protein names, the Accession number and percent coverage for all of the proteins in the DMSO control, 5, 10, and 50  $\mu$ M AI-HNE treated cells.

| DMSO Control (AI-HNE)                              |               |            |
|----------------------------------------------------|---------------|------------|
| Protein                                            | Accession     | % Coverage |
| 14-3-3 protein zeta/delta                          | IPI00021263.3 | 18         |
| 39 kDa protein                                     | IPI00334627.2 | 12         |
| 40S ribosomal protein S3                           | IPI00011253.2 | 15         |
| 42 kDa protein                                     | IPI00164375.6 | 11         |
| 60 kDa heat shock protein, mitochondrial precursor | IPI00472102.2 | 9          |
| 60S acidic ribosomal protein P0                    | IPI00008530.1 | 13         |
| 60S ribosomal protein L18                          | IPI00215719.5 | 26         |
| 78 kDa glucose-regulated protein precursor         | IPI00003362.1 | 13         |
| ADP/ATP translocase 2                              | IPI00007188.4 | 12         |
| ALB protein                                        | IPI00022434.2 | 5          |
| Actin, aortic smooth muscle                        | IPI00008603.1 | 9          |
| Actin, cytoplasmic 1                               | IPI00021439.1 | 13         |
| Alpha-enolase                                      | IPI00465248.4 | 15         |
| Alpha-enolase, lung specific                       | IPI00013769.1 | 10         |
| Cofilin, non-muscle isoform                        | IPI00012011.4 | 20         |
| Cytokeratin type II                                | IPI00005859.1 | 12         |
| Dermcidin precursor                                | IPI00027547.2 | 36         |
| Desmoglein-1 precursor                             | IPI00025753.1 | 5          |
| Elongation factor 1-alpha 2                        | IPI00014424.1 | 7          |
| Elongation factor 2                                | IPI00186290.5 | 6          |
| Filamin A, alpha                                   | IPI00302592.2 | 3          |
| Fructose-bisphosphate aldolase A                   | IPI00465439.4 | 23         |
| Glyceraldehyde-3-phosphate dehydrogenase           | IPI00219018.6 | 28         |
| Hypothetical protein DKFZp761K0511                 | IPI00334775.5 | 7          |
| KRT17 protein                                      | IPI00450768.5 | 15         |
| Keratin, type I cytoskeletal 10                    | IPI00009865.1 | 44         |
| Keratin, type I cytoskeletal 14                    | IPI00384444.4 | 18         |
| Keratin, type I cytoskeletal 16                    | IPI00217963.2 | 21         |
| Keratin, type I cytoskeletal 9                     | IPI00019359.3 | 51         |
| Keratin, type II cytoskeletal 1                    | IPI00220327.2 | 43         |
| Keratin, type II cytoskeletal 2 epidermal          | IPI00021304.1 | 53         |
| Keratin, type II cytoskeletal 5                    | IPI00009867.2 | 21         |
| Keratin, type II cytoskeletal 6A                   | IPI00300725.6 | 4          |
| Keratin, type II cytoskeletal 6B                   | IPI00293665.6 | 13         |
| L-lactate dehydrogenase B chain                    | IPI00219217.2 | 6          |
| Macrophage migration inhibitory factor             | IPI00293276.9 | 18         |

|                                                       |                  |                   |
|-------------------------------------------------------|------------------|-------------------|
| PREDICTED: heat shock 90kDa protein 1, alpha-like 3   | IPI00031523.2    | 7                 |
| Peroxiredoxin-1                                       | IPI00000874.1    | 14                |
| Profilin-1                                            | IPI00216691.4    | 40                |
| Prolactin-inducible protein precursor                 | IPI00022974.1    | 25                |
| RcTPI1 (Fragment)                                     | IPI00383071.1    | 27                |
| Splice Isoform 1 of Heat shock cognate 71 kDa protein | IPI00003865.1    | 12                |
| Splice Isoform 1 of Keratin, type I cytoskeletal 13   | IPI00009866.6    | 5                 |
| Splice Isoform DPI of Desmoplakin                     | IPI00013933.1    | 2                 |
| Stress-70 protein, mitochondrial precursor            | IPI00007765.5    | 12                |
| TUBA6 protein                                         | IPI00166768.2    | 17                |
| Tubulin beta-2 chain                                  | IPI00011654.2    | 10                |
| Tubulin beta-2C chain                                 | IPI00007752.1    | 21                |
| poly(rC)-binding protein 2 isoform b                  | IPI00012066.1    | 13                |
| pyruvate kinase 3 isoform 2                           | IPI00220644.6    | 15                |
| <b>5 <math>\mu</math>M AI-HNE</b>                     |                  |                   |
| <b>Protein</b>                                        | <b>Accession</b> | <b>% Coverage</b> |
| 116 kDa U5 small nuclear ribonucleoprotein component  | IPI00003519.1    | 7                 |
| 130 kDa leucine-rich protein                          | IPI00329745.4    | 11                |
| 14-3-3 protein epsilon                                | IPI00000816.1    | 33                |
| 14-3-3 protein theta                                  | IPI00018146.1    | 28                |
| 14-3-3 protein zeta/delta                             | IPI00021263.3    | 23                |
| 19 kDa protein                                        | IPI00027388.5    | 13                |
| 26S proteasome non-ATPase regulatory subunit 2        | IPI00012268.2    | 16                |
| 29 kDa protein                                        | IPI00015139.3    | 17                |
| 29 kDa protein                                        | IPI00178083.2    | 15                |
| 39 kDa protein                                        | IPI00334627.2    | 30                |
| 40S ribosomal protein S14                             | IPI00026271.4    | 30                |
| 40S ribosomal protein S15a                            | IPI00221091.7    | 33                |
| 40S ribosomal protein S2                              | IPI00013485.3    | 16                |
| 40S ribosomal protein S3                              | IPI00011253.2    | 49                |
| 40S ribosomal protein S4, X isoform                   | IPI00217030.9    | 16                |
| 40S ribosomal protein S6                              | IPI00021840.1    | 11                |
| 40S ribosomal protein S8                              | IPI00216587.8    | 24                |
| 40S ribosomal protein S9                              | IPI00221088.4    | 16                |
| 42 kDa protein                                        | IPI00164375.6    | 9                 |
| 60 kDa heat shock protein, mitochondrial precursor    | IPI00472102.2    | 40                |
| 60S acidic ribosomal protein P0                       | IPI00008530.1    | 33                |
| 60S ribosomal protein L12                             | IPI00024933.3    | 43                |
| 60S ribosomal protein L18                             | IPI00215719.5    | 26                |
| 60S ribosomal protein L18a                            | IPI00026202.1    | 21                |
| 60S ribosomal protein L23                             | IPI00010153.5    | 32                |
| 60S ribosomal protein L24                             | IPI00306332.4    | 13                |
| 60S ribosomal protein L30                             | IPI00219156.6    | 35                |
| 60S ribosomal protein L4                              | IPI00003918.4    | 13                |
| 60S ribosomal protein L7a                             | IPI00299573.11   | 11                |
| 60S ribosomal protein L9                              | IPI00031691.1    | 22                |

|                                                             |                |    |
|-------------------------------------------------------------|----------------|----|
| 78 kDa glucose-regulated protein precursor                  | IPI00003362.1  | 39 |
| 93 kDa protein                                              | IPI00177366.2  | 6  |
| ADP/ATP translocase 2                                       | IPI00007188.4  | 21 |
| ALB protein                                                 | IPI00022434.2  | 5  |
| ATP synthase alpha chain, mitochondrial precursor           | IPI00440493.2  | 15 |
| ATP-citrate synthase                                        | IPI00021290.4  | 10 |
| ATP-dependent DNA helicase II 80 kDa subunit                | IPI00220834.7  | 5  |
| ATP-dependent RNA helicase DDX3X                            | IPI00215637.4  | 16 |
| Acetyl-CoA acetyltransferase, mitochondrial precursor       | IPI00030363.1  | 10 |
| Acidic leucine-rich nuclear phosphoprotein 32 family member | IPI00007423.1  | 16 |
| Actin, aortic smooth muscle                                 | IPI00008603.1  | 13 |
| Actin, cytoplasmic 1                                        | IPI00021439.1  | 31 |
| Activator 1 37 kDa subunit                                  | IPI00017381.1  | 9  |
| Adenosylhomocysteinase                                      | IPI00012007.5  | 8  |
| Alanyl-tRNA synthetase                                      | IPI00027442.3  | 8  |
| Aldehyde dehydrogenase, mitochondrial precursor             | IPI00006663.1  | 21 |
| Alpha-actinin-1                                             | IPI00013508.4  | 20 |
| Alpha-enolase                                               | IPI00465248.4  | 21 |
| Alpha-enolase, lung specific                                | IPI00013769.1  | 12 |
| Annexin A5                                                  | IPI00329801.11 | 32 |
| Arginyl-tRNA synthetase                                     | IPI00004860.2  | 14 |
| Aspartate aminotransferase, mitochondrial precursor         | IPI00018206.3  | 25 |
| Aspartyl-tRNA synthetase                                    | IPI00216951.2  | 10 |
| Bifunctional purine biosynthesis protein PURH               | IPI00289499.3  | 16 |
| C-1-tetrahydrofolate synthase, cytoplasmic                  | IPI00218342.9  | 7  |
| CAD protein                                                 | IPI00301263.2  | 2  |
| CDNA FLJ13369 fis, clone PLACE1000610, weakly similar to MS | IPI00549861.2  | 7  |
| CDNA FLJ34068 fis, clone FCBBF3001918, highly similar to SE | IPI00168184.6  | 12 |
| CDNA FLJ45706 fis, clone FEBRA2028457, highly similar to Nu | IPI00444262.1  | 9  |
| CTP synthase                                                | IPI00290142.5  | 8  |
| Calnexin precursor                                          | IPI00020984.1  | 8  |
| Carbonyl reductase [NADPH] 1                                | IPI00295386.6  | 15 |
| Chloride intracellular channel protein 1                    | IPI00010896.2  | 43 |
| Coatomer subunit beta                                       | IPI00295851.3  | 5  |
| Coatomer subunit gamma                                      | IPI00001890.7  | 5  |
| Cofilin, non-muscle isoform                                 | IPI00012011.4  | 37 |
| Condensin complex subunit 1                                 | IPI00299524.1  | 2  |
| Coproporphyrinogen III oxidase, mitochondrial precursor     | IPI00093057.6  | 8  |
| Coronin-1C                                                  | IPI00008453.3  | 12 |
| Cytokeratin type II                                         | IPI00005859.1  | 6  |
| DEAH (Asp-Glu-Ala-His) box polypeptide 9 isoform 1          | IPI00215638.4  | 6  |
| DJ1014D13.1 protein                                         | IPI00465233.1  | 6  |
| DNA replication licensing factor MCM2                       | IPI00184330.5  | 10 |
| DNA replication licensing factor MCM4                       | IPI00018349.5  | 7  |
| DNA replication licensing factor MCM6                       | IPI00031517.1  | 12 |

|                                                             |                |    |
|-------------------------------------------------------------|----------------|----|
| Dolichyl-diphosphooligosaccharide--protein glycosyltransfer | IPI00025874.1  | 11 |
| Drebrin                                                     | IPI00003406.2  | 7  |
| Dynein heavy chain, cytosolic                               | IPI00456969.1  | 3  |
| EEF1A1 protein                                              | IPI00025447.6  | 23 |
| Early endosome antigen 1                                    | IPI00329536.1  | 3  |
| Early endosome antigen 1                                    | IPI00329536.1  | 3  |
| Electron transfer flavoprotein alpha-subunit, mitochondrial | IPI00010810.1  | 19 |
| Elongation factor 1-alpha 2                                 | IPI00014424.1  | 18 |
| Elongation factor 1-beta                                    | IPI00178440.2  | 21 |
| Elongation factor 1-delta                                   | IPI00023048.3  | 13 |
| Elongation factor 1-gamma                                   | IPI00000875.5  | 11 |
| Elongation factor 2                                         | IPI00186290.5  | 34 |
| Elongation factor Tu, mitochondrial precursor               | IPI00027107.4  | 16 |
| Endoplasmic precursor                                       | IPI00027230.3  | 18 |
| Eukaryotic initiation factor 4A-I                           | IPI00025491.1  | 12 |
| Eukaryotic translation initiation factor 3 subunit 10       | IPI00029012.1  | 8  |
| Eukaryotic translation initiation factor 3 subunit 7        | IPI00006181.1  | 6  |
| Exportin-1                                                  | IPI00298961.3  | 6  |
| FK506-binding protein 4                                     | IPI00219005.2  | 11 |
| Family with sequence similarity 62 (C2 domain containing),  | IPI00022143.3  | 5  |
| Far upstream element-binding protein 2                      | IPI00298363.2  | 18 |
| Fatty acid synthase                                         | IPI00026781.2  | 26 |
| Fatty acid-binding protein, epidermal                       | IPI00007797.2  | 25 |
| Filamin A, alpha                                            | IPI00302592.2  | 24 |
| Fructose-bisphosphate aldolase A                            | IPI00465439.4  | 36 |
| G22P1 protein                                               | IPI00465430.4  | 7  |
| GARS protein                                                | IPI00465260.3  | 5  |
| GCN1-like protein 1                                         | IPI00001159.8  | 3  |
| GMP synthase                                                | IPI00029079.5  | 9  |
| GPI-anchored protein p137                                   | IPI00030910.1  | 5  |
| GTP-binding nuclear protein RAN                             | IPI00012507.3  | 14 |
| Glucose-6-phosphate isomerase                               | IPI00027497.4  | 10 |
| Glutathione S-transferase P                                 | IPI00219757.12 | 32 |
| Glyceraldehyde-3-phosphate dehydrogenase                    | IPI00219018.6  | 36 |
| Guanine nucleotide-binding protein beta subunit 2-like 1    | IPI00641950.1  | 14 |
| HADH2 protein                                               | IPI00017726.1  | 36 |
| HNRPF protein                                               | IPI00003881.5  | 20 |
| Heat shock 70 kDa protein 1                                 | IPI00304925.3  | 17 |
| Heat shock 70 kDa protein 1L                                | IPI00301277.1  | 9  |
| Heat shock 70 kDa protein 4                                 | IPI00002966.1  | 27 |
| Heat shock 70 kDa protein 4L                                | IPI00295485.1  | 12 |
| Heat shock protein 75 kDa, mitochondrial precursor          | IPI00030275.5  | 9  |
| Heat shock protein HSP 90-alpha 2                           | IPI00382470.2  | 11 |
| Histone H4                                                  | IPI00453473.5  | 29 |
| Hypothetical protein DKFZp313B047                           | IPI00013452.8  | 10 |
| Hypothetical protein DKFZp451D234                           | IPI00031583.2  | 4  |
| Hypothetical protein DKFZp686L20222                         | IPI00026689.4  | 13 |



|                                                             |               |    |
|-------------------------------------------------------------|---------------|----|
| Hypothetical protein DKFZp761K0511                          | IPI00334775.5 | 35 |
| Hypoxanthine-guanine phosphoribosyltransferase              | IPI00218493.6 | 17 |
| IARS protein                                                | IPI00013234.2 | 9  |
| Importin beta-1 subunit                                     | IPI00001639.2 | 11 |
| Importin beta-2 subunit                                     | IPI00024364.2 | 5  |
| Importin beta-3                                             | IPI00329200.5 | 10 |
| Inosine-5'-monophosphate dehydrogenase 2                    | IPI00291510.3 | 9  |
| Keratin, type I cytoskeletal 10                             | IPI00009865.1 | 42 |
| Keratin, type I cytoskeletal 14                             | IPI00384444.4 | 14 |
| Keratin, type I cytoskeletal 9                              | IPI00019359.3 | 49 |
| Keratin, type II cytoskeletal 1                             | IPI00220327.2 | 50 |
| Keratin, type II cytoskeletal 2 epidermal                   | IPI00021304.1 | 49 |
| Keratin, type II cytoskeletal 5                             | IPI00009867.2 | 13 |
| Kinesin heavy chain                                         | IPI00012837.1 | 12 |
| L-lactate dehydrogenase B chain                             | IPI00219217.2 | 40 |
| Lamina-associated polypeptide 2 isoform alpha               | IPI00216230.2 | 6  |
| Leucyl-tRNA synthetase, cytoplasmic                         | IPI00103994.4 | 7  |
| Malate dehydrogenase, cytoplasmic                           | IPI00291005.7 | 17 |
| Malate dehydrogenase, mitochondrial precursor               | IPI00291006.1 | 44 |
| Methionyl-tRNA synthetase                                   | IPI00008240.2 | 5  |
| Microsomal glutathione S-transferase 1                      | IPI00021805.1 | 27 |
| Multifunctional protein ADE2                                | IPI00217223.1 | 18 |
| Myosin regulatory light chain                               | IPI00033494.3 | 19 |
| Myosin-9                                                    | IPI00019502.2 | 33 |
| NCL protein                                                 | IPI00183526.5 | 10 |
| NOL1/NOP2/Sun domain family 2 protein                       | IPI00306369.3 | 9  |
| Nucleoside diphosphate kinase A                             | IPI00012048.1 | 24 |
| ORF protein                                                 | IPI00171903.1 | 11 |
| PREDICTED: KIAA0368 protein                                 | IPI00157790.4 | 5  |
| PREDICTED: KIAA1765 protein                                 | IPI00028196.4 | 2  |
| PREDICTED: heat shock 90kDa protein 1, alpha-like 3         | IPI00031523.2 | 19 |
| PREDICTED: similar to 40S ribosomal protein SA              | IPI00397774.1 | 18 |
| PREDICTED: similar to 60S ribosomal protein L27a            | IPI00398135.2 | 22 |
| PREDICTED: similar to Ran-specific GTPase-activating protei | IPI00399212.1 | 15 |
| Peptidyl-prolyl cis-trans isomerase B precursor             | IPI00646304.2 | 24 |
| Peroxiredoxin-1                                             | IPI00000874.1 | 34 |
| Peroxiredoxin-2                                             | IPI00027350.2 | 14 |
| Peroxiredoxin-6                                             | IPI00220301.4 | 25 |
| Phosphoglycerate kinase 1                                   | IPI00169383.2 | 14 |
| Phosphoglycerate mutase 2                                   | IPI00218570.5 | 14 |
| Phosphoribosylformylglycinamide synthase                    | IPI00004534.3 | 6  |
| Plastin-2                                                   | IPI00010471.3 | 26 |
| Poly(rC)-binding protein 1                                  | IPI00016610.2 | 21 |
| Pre-mRNA-processing splicing factor 8                       | IPI00007928.4 | 2  |
| Pre-mRNA-processing splicing factor 8                       | IPI00007928.4 | 2  |
| Probable ATP-dependent RNA helicase DDX5                    | IPI00017617.1 | 13 |
| Profilin-1                                                  | IPI00216691.4 | 50 |

|                                                             |               |    |
|-------------------------------------------------------------|---------------|----|
| Prohibitin                                                  | IPI00017334.1 | 28 |
| Proliferating cell nuclear antigen                          | IPI00021700.3 | 41 |
| Proliferation-associated protein 2G4                        | IPI00299000.3 | 12 |
| Proliferation-inducing gene 21                              | IPI00552496.1 | 35 |
| Proteasome activator complex subunit 2                      | IPI00384051.4 | 23 |
| Protein disulfide-isomerase A3 precursor                    | IPI00025252.1 | 18 |
| Protein phosphatase 2C isoform gamma                        | IPI00006167.1 | 7  |
| Purine nucleoside phosphorylase                             | IPI00017672.3 | 18 |
| Puromycin-sensitive aminopeptidase                          | IPI00026216.4 | 7  |
| Ras GTPase-activating-like protein IQGAP1                   | IPI00009342.1 | 6  |
| Ras-related protein Rap-1b precursor                        | IPI00015148.3 | 21 |
| RcTPI1 (Fragment)                                           | IPI00383071.1 | 32 |
| Ribonuclease inhibitor                                      | IPI00550069.2 | 13 |
| Ribonucleases P/MRP protein subunit POP1                    | IPI00293331.3 | 3  |
| Ribonucleoside-diphosphate reductase large subunit          | IPI00013871.1 | 8  |
| Ribosomal pRotein L15; 60S Ribosomal pRotein L15            | IPI00375511.4 | 17 |
| S-methyl-5-thioadenosine phosphorylase                      | IPI00011876.1 | 20 |
| Serine hydroxymethyltransferase, mitochondrial precursor    | IPI00002520.1 | 8  |
| Serine-threonine kinase receptor-associated protein         | IPI00294536.1 | 14 |
| Serine/threonine-protein phosphatase 2A catalytic subunit a | IPI00008380.1 | 13 |
| Signal recognition particle receptor beta subunit           | IPI00295098.3 | 28 |
| Similar to Clathrin heavy chain                             | IPI00024067.2 | 14 |
| Similar to heterogeneous nuclear ribonucleoprotein A1 isofo | IPI00042578.5 | 10 |
| Splice Isoform 1 of 60S ribosomal protein L11               | IPI00219150.5 | 18 |
| Splice Isoform 1 of Clathrin heavy chain 2                  | IPI00022881.1 | 3  |
| Splice Isoform 1 of Cullin-associated NEDD8-dissociated pro | IPI00100160.3 | 14 |
| Splice Isoform 1 of DNA replication licensing factor MCM7   | IPI00299904.3 | 6  |
| Splice Isoform 1 of DNA-dependent protein kinase catalytic  | IPI00296337.2 | 9  |
| Splice Isoform 1 of F-actin capping protein beta subunit    | IPI00026185.5 | 21 |
| Splice Isoform 1 of Filamin-B                               | IPI00289334.1 | 7  |
| Splice Isoform 1 of Heat shock cognate 71 kDa protein       | IPI00003865.1 | 39 |
| Splice Isoform 1 of Heterogeneous nuclear ribonucleoprotein | IPI00216049.1 | 34 |
| Splice Isoform 1 of Hexokinase-1                            | IPI00018246.4 | 3  |
| Splice Isoform 1 of Importin-4                              | IPI00156374.4 | 7  |
| Splice Isoform 1 of Importin-alpha re-exporter              | IPI00022744.5 | 11 |
| Splice Isoform 1 of Isocitrate dehydrogenase [NAD] subunit  | IPI00030702.1 | 9  |
| Splice Isoform 1 of Mitochondrial inner membrane protein    | IPI00009960.6 | 14 |
| Splice Isoform 1 of Nucleolar RNA helicase 2                | IPI00015953.3 | 6  |
| Splice Isoform 1 of Plectin 1                               | IPI00014898.1 | 2  |
| Splice Isoform 1 of Polyadenylate-binding protein 1         | IPI00008524.1 | 18 |
| Splice Isoform 1 of Polypyrimidine tract-binding protein 1  | IPI00179964.5 | 15 |
| Splice Isoform 1 of Proteasome activator complex subunit 3  | IPI00030243.1 | 20 |
| Splice Isoform 1 of Spectrin alpha chain, brain             | IPI00413728.2 | 2  |
| Splice Isoform 1 of Structural maintenance of chromosome 2- | IPI00007927.3 | 3  |
| Splice Isoform 1 of Transcription intermediary factor 1-bet | IPI00438229.1 | 13 |
| Splice Isoform 1 of Uridine phosphorylase 1                 | IPI00004406.1 | 17 |
| Splice Isoform 1 of Voltage-dependent anion-selective chann | IPI00024145.1 | 31 |

|                                                             |               |    |
|-------------------------------------------------------------|---------------|----|
| Splice Isoform 1 of Voltage-dependent anion-selective chann | IPI00031804.1 | 39 |
| Splice Isoform 2 of NMDA receptor-regulated protein 1       | IPI00032158.2 | 11 |
| Splice Isoform 2 of Nucleophosmin                           | IPI00220740.1 | 20 |
| Splice Isoform 2 of Signal recognition particle 68 kDa prot | IPI00102936.3 | 6  |
| Splice Isoform 2 of Structural maintenance of chromosomes 4 | IPI00328298.6 | 4  |
| Splice Isoform A of Phosphate carrier protein, mitochondria | IPI00022202.3 | 12 |
| Splice Isoform AGX2 of UDP-N-acetylhexosamine pyrophosphory | IPI00000684.4 | 7  |
| Splice Isoform C1 of Heterogeneous nuclear ribonucleoprotei | IPI00216592.1 | 9  |
| Splice Isoform DUT-M of Deoxyuridine 5'-triphosphate nucleo | IPI00013679.1 | 15 |
| Splice Isoform GTBP-alt of DNA mismatch repair protein MSH6 | IPI00106847.3 | 3  |
| Splice Isoform Gamma-1 of Serine/threonine-protein phosphat | IPI00005705.1 | 16 |
| Splice Isoform Long of Delta 1-pyrroline-5-carboxylate synt | IPI00008982.1 | 17 |
| Splice Isoform Long of Heterogenous nuclear ribonucleoprote | IPI00025054.1 | 14 |
| Splice Isoform Long of Sodium/potassium-transporting ATPase | IPI00006482.1 | 4  |
| Splice Isoform Long of Trifunctional purine biosynthetic pr | IPI00025273.1 | 13 |
| Splice Isoform Long of Ubiquitin carboxyl-terminal hydrolas | IPI00024664.1 | 9  |
| Splice Isoform SERCA1B of Sarcoplasmic/endoplasmic reticulu | IPI00024804.3 | 7  |
| Splice Isoform SERCA2A of Sarcoplasmic/endoplasmic reticulu | IPI00177817.4 | 6  |
| Splicing factor 3B subunit 1                                | IPI00026089.3 | 4  |
| Splicing factor 3B subunit 3                                | IPI00300371.3 | 9  |
| Staphylococcal nuclease domain-containing protein 1         | IPI00140420.4 | 15 |
| Stress-70 protein, mitochondrial precursor                  | IPI00007765.5 | 37 |
| Stress-induced-phosphoprotein 1                             | IPI00013894.1 | 14 |
| T-complex protein 1 subunit alpha                           | IPI00290566.1 | 16 |
| T-complex protein 1 subunit beta                            | IPI00297779.6 | 18 |
| T-complex protein 1 subunit delta                           | IPI00302927.5 | 10 |
| T-complex protein 1 subunit epsilon                         | IPI00010720.1 | 8  |
| T-complex protein 1 subunit eta                             | IPI00018465.1 | 18 |
| T-complex protein 1 subunit theta                           | IPI00302925.3 | 18 |
| T-complex protein 1 subunit zeta                            | IPI00027626.2 | 23 |
| TUBA6 protein                                               | IPI00166768.2 | 20 |
| Talin-1                                                     | IPI00298994.4 | 8  |
| Thioredoxin-dependent peroxide reductase, mitochondrial pre | IPI00024919.3 | 16 |
| Threonyl-tRNA synthetase, cytoplasmic                       | IPI00329633.5 | 10 |
| Transferrin receptor protein 1                              | IPI00022462.1 | 7  |
| Transitional endoplasmic reticulum ATPase                   | IPI00022774.2 | 23 |
| Transketolase                                               | IPI00021716.1 | 16 |
| Translocated promoter region                                | IPI00022970.3 | 2  |
| Trifunctional enzyme alpha subunit, mitochondrial precursor | IPI00031522.2 | 13 |
| Tubulin alpha-1 chain                                       | IPI00007750.1 | 41 |
| Tubulin beta-1 chain                                        | IPI00006510.1 | 6  |

|                                                             |               |            |
|-------------------------------------------------------------|---------------|------------|
| Tubulin beta-2 chain                                        | IPI00011654.2 | 17         |
| Tubulin beta-2C chain                                       | IPI00007752.1 | 56         |
| U5 small nuclear ribonucleoprotein 200 kDa helicase         | IPI00420014.2 | 4          |
| Ubiquitin carboxyl-terminal hydrolase 7                     | IPI00003965.4 | 5          |
| Ubiquitin-activating enzyme E1                              | IPI00026119.6 | 14         |
| Ubiquitin-activating enzyme E1                              | IPI00645078.1 | 10         |
| Valyl-tRNA synthetase                                       | IPI00000873.3 | 3          |
| WUGSC:H_RG054D04.1 protein                                  | IPI00011457.1 | 14         |
| Zyxin                                                       | IPI00020513.2 | 10         |
| chaperonin containing TCP1, subunit 3 isoform b             | IPI00290770.3 | 13         |
| heterogeneous nuclear ribonucleoprotein D-like              | IPI00011274.1 | 11         |
| heterogeneous nuclear ribonucleoprotein H1                  | IPI00013881.5 | 19         |
| heterogeneous nuclear ribonucleoprotein L isoform a         | IPI00027834.3 | 11         |
| homolog of yeast mRNA transport regulator 3                 | IPI00073602.1 | 13         |
| lactate dehydrogenase A                                     | IPI00217966.6 | 24         |
| poly(rC)-binding protein 2 isoform b                        | IPI00012066.1 | 27         |
| pyruvate kinase 3 isoform 2                                 | IPI00220644.6 | 52         |
| smooth muscle and non-muscle myosin alkali light chain isof | IPI00066374.1 | 27         |
| thymopoietin isoform beta                                   | IPI00030131.2 | 13         |
| <b>10 <math>\mu</math>M AI-HNE</b>                          |               |            |
| Protein                                                     | Accession     | % Coverage |
| 116 kDa U5 small nuclear ribonucleoprotein component        | IPI00003519.1 | 6          |
| 130 kDa leucine-rich protein                                | IPI00329745.4 | 14         |
| 14-3-3 protein beta/alpha                                   | IPI00216318.4 | 23         |
| 14-3-3 protein epsilon                                      | IPI00000816.1 | 42         |
| 14-3-3 protein theta                                        | IPI00018146.1 | 36         |
| 14-3-3 protein zeta/delta                                   | IPI00021263.3 | 40         |
| 19 kDa protein                                              | IPI00027388.5 | 18         |
| 26S protease regulatory subunit 4                           | IPI00011126.6 | 20         |
| 26S protease regulatory subunit 6A                          | IPI00018398.4 | 15         |
| 26S protease regulatory subunit 7                           | IPI00021435.2 | 19         |
| 26S protease regulatory subunit 8                           | IPI00023919.4 | 9          |
| 26S proteasome non-ATPase regulatory subunit 12             | IPI00185374.3 | 10         |
| 26S proteasome non-ATPase regulatory subunit 2              | IPI00012268.2 | 16         |
| 29 kDa protein                                              | IPI00015139.3 | 23         |
| 29 kDa protein                                              | IPI00178083.2 | 29         |
| 29 kDa protein                                              | IPI00453476.2 | 36         |
| 3-ketoacyl-CoA thiolase, mitochondrial                      | IPI00001539.8 | 18         |
| 31 kDa protein                                              | IPI00374686.2 | 9          |
| 38 kDa protein                                              | IPI00293845.3 | 13         |
| 39 kDa protein                                              | IPI00334627.2 | 30         |
| 40S ribosomal protein S14                                   | IPI00026271.4 | 30         |
| 40S ribosomal protein S15a                                  | IPI00221091.7 | 33         |
| 40S ribosomal protein S16                                   | IPI00221092.7 | 20         |
| 40S ribosomal protein S17                                   | IPI00221093.6 | 41         |
| 40S ribosomal protein S2                                    | IPI00013485.3 | 25         |

|                                                       |               |    |
|-------------------------------------------------------|---------------|----|
| 40S ribosomal protein S20                             | IPI00012493.1 | 23 |
| 40S ribosomal protein S25                             | IPI00012750.3 | 16 |
| 40S ribosomal protein S3                              | IPI00011253.2 | 37 |
| 40S ribosomal protein S4, X isoform                   | IPI00217030.9 | 21 |
| 40S ribosomal protein S5                              | IPI00008433.3 | 24 |
| 40S ribosomal protein S6                              | IPI00021840.1 | 16 |
| 40S ribosomal protein S8                              | IPI00216587.8 | 31 |
| 40S ribosomal protein S9                              | IPI00221088.4 | 13 |
| 42 kDa protein                                        | IPI00164375.6 | 11 |
| 4F2 cell-surface antigen heavy chain                  | IPI00027493.1 | 9  |
| 53 kDa protein                                        | IPI00172579.3 | 12 |
| 6-phosphogluconate dehydrogenase, decarboxylating     | IPI00219525.9 | 20 |
| 60 kDa heat shock protein, mitochondrial precursor    | IPI00472102.2 | 44 |
| 60 kDa protein                                        | IPI00220480.6 | 8  |
| 60S acidic ribosomal protein P0                       | IPI00008530.1 | 58 |
| 60S ribosomal protein L12                             | IPI00024933.3 | 43 |
| 60S ribosomal protein L18                             | IPI00215719.5 | 26 |
| 60S ribosomal protein L18a                            | IPI00026202.1 | 21 |
| 60S ribosomal protein L19                             | IPI00025329.1 | 14 |
| 60S ribosomal protein L23                             | IPI00010153.5 | 38 |
| 60S ribosomal protein L24                             | IPI00306332.4 | 19 |
| 60S ribosomal protein L30                             | IPI00219156.6 | 35 |
| 60S ribosomal protein L36                             | IPI00216237.4 | 22 |
| 60S ribosomal protein L38                             | IPI00215790.5 | 36 |
| 60S ribosomal protein L4                              | IPI00003918.4 | 15 |
| 60S ribosomal protein L6                              | IPI00329389.5 | 14 |
| 60S ribosomal protein L8                              | IPI00012772.7 | 19 |
| 60S ribosomal protein L9                              | IPI00031691.1 | 22 |
| 78 kDa glucose-regulated protein precursor            | IPI00003362.1 | 34 |
| 80 kDa nuclear cap binding protein                    | IPI00019380.1 | 5  |
| 93 kDa protein                                        | IPI00177366.2 | 10 |
| ADP-ribosylation factor 1                             | IPI00215914.4 | 36 |
| ADP/ATP translocase 2                                 | IPI00007188.4 | 20 |
| ALB protein                                           | IPI00022434.2 | 8  |
| ATP synthase O subunit, mitochondrial precursor       | IPI00007611.1 | 34 |
| ATP synthase alpha chain, mitochondrial precursor     | IPI00440493.2 | 29 |
| ATP-citrate synthase                                  | IPI00021290.4 | 14 |
| ATP-dependent DNA helicase II 80 kDa subunit          | IPI00220834.7 | 5  |
| ATP-dependent RNA helicase DDX3X                      | IPI00215637.4 | 18 |
| Acetyl-CoA acetyltransferase, mitochondrial precursor | IPI00030363.1 | 15 |
| Actin, aortic smooth muscle                           | IPI00008603.1 | 21 |
| Actin, cytoplasmic 1                                  | IPI00021439.1 | 32 |
| Actin-like protein 2                                  | IPI00005159.3 | 9  |
| Adenosylhomocysteinase                                | IPI00012007.5 | 8  |
| Adenylate kinase isoenzyme 1                          | IPI00018342.5 | 23 |
| Adenyl cyclase-associated protein 1                   | IPI00008274.5 | 9  |
| Alanyl-tRNA synthetase                                | IPI00027442.3 | 12 |

|                                                             |                |    |
|-------------------------------------------------------------|----------------|----|
| Aldehyde dehydrogenase, mitochondrial precursor             | IPI00006663.1  | 32 |
| Alpha-actinin-1                                             | IPI00013508.4  | 29 |
| Alpha-actinin-4                                             | IPI00013808.1  | 11 |
| Alpha-enolase                                               | IPI00465248.4  | 33 |
| Alpha-enolase, lung specific                                | IPI00013769.1  | 12 |
| Alpha-taxilin                                               | IPI00470779.2  | 10 |
| Annexin A5                                                  | IPI00329801.11 | 20 |
| Arginyl-tRNA synthetase                                     | IPI00004860.2  | 19 |
| Aspartate aminotransferase, mitochondrial precursor         | IPI00018206.3  | 21 |
| Aspartyl-tRNA synthetase                                    | IPI00216951.2  | 8  |
| BAG family molecular chaperone regulator 2                  | IPI00000643.1  | 15 |
| Bifunctional purine biosynthesis protein PURH               | IPI00289499.3  | 30 |
| C-1-tetrahydrofolate synthase, cytoplasmic                  | IPI00218342.9  | 11 |
| CAD protein                                                 | IPI00301263.2  | 10 |
| CDNA FLJ10719 fis, clone NT2RP3001109. (Fragment)           | IPI00019447.3  | 4  |
| CDNA FLJ13369 fis, clone PLACE1000610, weakly similar to MS | IPI00549861.2  | 12 |
| CDNA FLJ33352 fis, clone BRACE2005087, weakly similar to PR | IPI00168235.4  | 7  |
| CDNA FLJ34068 fis, clone FCBBF3001918, highly similar to SE | IPI00168184.6  | 20 |
| CDNA FLJ45525 fis, clone BRTHA2026311, highly similar to Pr | IPI00299571.4  | 14 |
| CDNA FLJ45706 fis, clone FEBRA2028457, highly similar to Nu | IPI00444262.1  | 10 |
| CTP synthase                                                | IPI00290142.5  | 12 |
| Calponin-2                                                  | IPI00015262.9  | 22 |
| Carbonyl reductase [NADPH] 1                                | IPI00295386.6  | 33 |
| Cargo selection protein TIP47                               | IPI00106668.3  | 22 |
| Chloride intracellular channel protein 1                    | IPI00010896.2  | 52 |
| Chromobox protein homolog 1                                 | IPI00010320.1  | 9  |
| Chromobox protein homolog 3                                 | IPI00297579.3  | 21 |
| Chromosome 9 open reading frame 32                          | IPI00515040.1  | 21 |
| Citrate synthase, mitochondrial precursor                   | IPI00025366.4  | 8  |
| Coatomer subunit beta                                       | IPI00295851.3  | 4  |
| Coatomer subunit gamma                                      | IPI00001890.7  | 9  |
| Cofilin, non-muscle isoform                                 | IPI00012011.4  | 42 |
| Coiled-coil-helix-coiled-coil-helix domain-containing prote | IPI00015833.1  | 22 |
| Condensin complex subunit 1                                 | IPI00299524.1  | 3  |
| Copine-3                                                    | IPI00024403.1  | 6  |
| Coproporphyrinogen III oxidase, mitochondrial precursor     | IPI00093057.6  | 9  |
| Coronin-1C                                                  | IPI00008453.3  | 15 |
| Crk-like protein                                            | IPI00004839.1  | 14 |
| Cytochrome c oxidase subunit 2                              | IPI00017510.3  | 16 |
| Cytokeratin type II                                         | IPI00005859.1  | 14 |
| D-3-phosphoglycerate dehydrogenase                          | IPI00011200.4  | 15 |
| DEAH (Asp-Glu-Ala-His) box polypeptide 9 isoform 1          | IPI00215638.4  | 12 |
| DEAH (Asp-Glu-Ala-His) box polypeptide 9 isoform 2          | IPI00155723.3  | 19 |

|                                                             |               |    |
|-------------------------------------------------------------|---------------|----|
| DJ1014D13.1 protein                                         | IPI00465233.1 | 9  |
| DNA replication licensing factor MCM2                       | IPI00184330.5 | 11 |
| DNA replication licensing factor MCM4                       | IPI00018349.5 | 6  |
| DNA replication licensing factor MCM6                       | IPI00031517.1 | 11 |
| DNA replication licensing factor MCM6                       | IPI00031517.1 | 11 |
| Desmoglein-1 precursor                                      | IPI00025753.1 | 5  |
| DnaJ homolog subfamily A member 1                           | IPI00012535.1 | 13 |
| DnaJ homolog subfamily C member 7                           | IPI00329629.6 | 7  |
| Dolichyl-diphosphooligosaccharide--protein glycosyltransfer | IPI00025874.1 | 18 |
| Drebrin                                                     | IPI00003406.2 | 7  |
| Dynactin 2 variant (Fragment)                               | IPI00220503.8 | 13 |
| Dynein heavy chain, cytosolic                               | IPI00456969.1 | 4  |
| EEF1A1 protein                                              | IPI00025447.6 | 23 |
| ENO1P protein                                               | IPI00328587.4 | 7  |
| ERO1-like protein alpha precursor                           | IPI00386755.2 | 10 |
| Early endosome antigen 1                                    | IPI00329536.1 | 7  |
| Electron transfer flavoprotein alpha-subunit, mitochondrial | IPI00010810.1 | 26 |
| Elongation factor 1-alpha 2                                 | IPI00014424.1 | 18 |
| Elongation factor 1-beta                                    | IPI00178440.2 | 21 |
| Elongation factor 1-delta                                   | IPI00023048.3 | 13 |
| Elongation factor 1-gamma                                   | IPI00000875.5 | 24 |
| Elongation factor 2                                         | IPI00186290.5 | 47 |
| Elongation factor Tu, mitochondrial precursor               | IPI00027107.4 | 24 |
| Endoplasmin precursor                                       | IPI00027230.3 | 22 |
| Enoyl-CoA hydratase, mitochondrial precursor                | IPI00024993.4 | 19 |
| Eukaryotic translation initiation factor 3 subunit 10       | IPI00029012.1 | 8  |
| Eukaryotic translation initiation factor 3 subunit 4        | IPI00290460.3 | 11 |
| Eukaryotic translation initiation factor 3 subunit 8        | IPI00016910.1 | 4  |
| Eukaryotic translation initiation factor 6                  | IPI00010105.1 | 29 |
| Exportin-1                                                  | IPI00298961.3 | 13 |
| F-actin capping protein alpha-1 subunit                     | IPI00005969.1 | 26 |
| FK506-binding protein 4                                     | IPI00219005.2 | 19 |
| Family with sequence similarity 62 (C2 domain containing),  | IPI00022143.3 | 12 |
| Far upstream element-binding protein 2                      | IPI00298363.2 | 26 |
| Fatty acid synthase                                         | IPI00026781.2 | 27 |
| Fatty acid synthase                                         | IPI00026781.2 | 27 |
| Fatty acid-binding protein, epidermal                       | IPI00007797.2 | 26 |
| Filamin A, alpha                                            | IPI00302592.2 | 39 |
| Fructose-bisphosphate aldolase A                            | IPI00465439.4 | 46 |
| Fructose-bisphosphate aldolase C                            | IPI00418262.3 | 15 |
| Fumarate hydratase, mitochondrial precursor                 | IPI00296053.3 | 21 |
| G22P1 protein                                               | IPI00465430.4 | 13 |
| GARS protein                                                | IPI00465260.3 | 14 |
| GCN1-like protein 1                                         | IPI00001159.8 | 4  |
| GMP synthase                                                | IPI00029079.5 | 15 |
| GPI-anchored protein p137                                   | IPI00030910.1 | 5  |
| GTP-binding nuclear protein RAN                             | IPI00012507.3 | 25 |

|                                                             |                |    |
|-------------------------------------------------------------|----------------|----|
| Galectin-1                                                  | IPI00219219.2  | 31 |
| Gamma-enolase                                               | IPI00216171.2  | 13 |
| Glucosamine 6-phosphate N-acetyltransferase                 | IPI00061525.3  | 23 |
| Glucose-6-phosphate isomerase                               | IPI00027497.4  | 15 |
| Glutamyl-tRNA synthetase                                    | IPI00026665.1  | 6  |
| Glutathione S-transferase P                                 | IPI00219757.12 | 48 |
| Glyceraldehyde-3-phosphate dehydrogenase                    | IPI00219018.6  | 54 |
| GrpE protein homolog 1, mitochondrial precursor             | IPI00029557.3  | 12 |
| Guanine nucleotide-binding protein G(I)/G(S)/G(T) beta subu | IPI00003348.2  | 12 |
| Guanine nucleotide-binding protein G(I)/G(S)/G(T) beta subu | IPI00003348.2  | 12 |
| HADH2 protein                                               | IPI00017726.1  | 48 |
| HLA class I histocompatibility antigen, B-7 alpha chain pre | IPI00004657.1  | 14 |
| HNRPF protein                                               | IPI00003881.5  | 20 |
| Heat shock 70 kDa protein 1                                 | IPI00304925.3  | 15 |
| Heat shock 70 kDa protein 1L                                | IPI00301277.1  | 13 |
| Heat shock 70 kDa protein 4                                 | IPI00002966.1  | 33 |
| Heat shock 70 kDa protein 4L                                | IPI00295485.1  | 17 |
| Heat shock protein 75 kDa, mitochondrial precursor          | IPI00030275.5  | 14 |
| Heat shock protein HSP 90-alpha 2                           | IPI00382470.2  | 14 |
| Heat-shock protein beta-1                                   | IPI00025512.2  | 55 |
| Heterogeneous nuclear ribonucleoprotein R                   | IPI00012074.3  | 9  |
| Histidyl-tRNA synthetase                                    | IPI00021808.3  | 17 |
| Histone H1.2                                                | IPI00217465.4  | 15 |
| Histone H4                                                  | IPI00453473.5  | 31 |
| Histone acetyltransferase type B catalytic subunit          | IPI00024719.1  | 11 |
| Hsc70-interacting protein                                   | IPI00032826.1  | 13 |
| Hsp90 co-chaperone Cdc37                                    | IPI00013122.1  | 15 |
| Hypothetical protein DKFZp313B047                           | IPI00013452.8  | 14 |
| Hypothetical protein DKFZp761K0511                          | IPI00334775.5  | 34 |
| Hypothetical protein FLJ13194                               | IPI00018627.1  | 24 |
| Hypothetical protein LRRC59                                 | IPI00396321.1  | 18 |
| Hypoxanthine-guanine phosphoribosyltransferase              | IPI00218493.6  | 23 |
| IARS protein                                                | IPI00013234.2  | 9  |
| Importin alpha-2 subunit                                    | IPI00002214.1  | 15 |
| Importin beta-1 subunit                                     | IPI00001639.2  | 15 |
| Importin beta-2 subunit                                     | IPI00024364.2  | 7  |
| Importin beta-3                                             | IPI00329200.5  | 14 |
| Inorganic pyrophosphatase                                   | IPI00015018.1  | 18 |
| Inosine-5'-monophosphate dehydrogenase 2                    | IPI00291510.3  | 13 |
| Interleukin enhancer-binding factor 2                       | IPI00005198.2  | 15 |
| Junction plakoglobin                                        | IPI00554711.1  | 6  |
| Keratin 5b                                                  | IPI00166205.2  | 9  |
| Keratin, type I cytoskeletal 10                             | IPI00009865.1  | 55 |
| Keratin, type I cytoskeletal 14                             | IPI00384444.4  | 25 |
| Keratin, type I cytoskeletal 16                             | IPI00217963.2  | 25 |
| Keratin, type I cytoskeletal 9                              | IPI00019359.3  | 62 |
| Keratin, type II cytoskeletal 1                             | IPI00220327.2  | 53 |



|                                                                |               |    |
|----------------------------------------------------------------|---------------|----|
| Keratin, type II cytoskeletal 2 epidermal                      | IPI00021304.1 | 67 |
| Keratin, type II cytoskeletal 2 oral                           | IPI00008359.1 | 3  |
| Keratin, type II cytoskeletal 5                                | IPI00009867.2 | 30 |
| Keratin, type II cytoskeletal 6B                               | IPI00293665.6 | 18 |
| Kinesin heavy chain                                            | IPI00012837.1 | 20 |
| L-lactate dehydrogenase B chain                                | IPI00219217.2 | 46 |
| LAP3 protein                                                   | IPI00419237.2 | 7  |
| LTA4H protein                                                  | IPI00219077.3 | 15 |
| Lactoylglutathione lyase                                       | IPI00220766.3 | 21 |
| Lamina-associated polypeptide 2 isoform alpha                  | IPI00216230.2 | 21 |
| Leucine zipper-EF-hand containing transmembrane protein 1,     | IPI00017592.1 | 4  |
| Leucyl-tRNA synthetase, cytoplasmic                            | IPI00103994.4 | 6  |
| Lupus La protein                                               | IPI00009032.1 | 13 |
| Macrophage migration inhibitory factor                         | IPI00293276.9 | 18 |
| Malate dehydrogenase, cytoplasmic                              | IPI00291005.7 | 29 |
| Malate dehydrogenase, mitochondrial precursor                  | IPI00291006.1 | 47 |
| Matrin-3                                                       | IPI00017297.1 | 13 |
| Methionine adenosyltransferase II, beta, isoform 1             | IPI00002324.3 | 18 |
| Methionyl-tRNA synthetase                                      | IPI00008240.2 | 7  |
| Methionyl-tRNA synthetase                                      | IPI00008240.2 | 7  |
| Microsomal glutathione S-transferase 1                         | IPI00021805.1 | 27 |
| Mitochondrial import receptor subunit TOM34                    | IPI00009946.4 | 17 |
| Mitochondrial processing peptidase beta subunit, mitochondr    | IPI00289535.6 | 13 |
| Mitotic checkpoint protein BUB3                                | IPI00013468.1 | 20 |
| Multifunctional protein ADE2                                   | IPI00217223.1 | 34 |
| Multisynthetase complex auxiliary component p38                | IPI00011916.1 | 20 |
| Myosin-9                                                       | IPI00019502.2 | 38 |
| NADH-ubiquinone oxidoreductase 30 kDa subunit,<br>mitochondria | IPI00025796.3 | 14 |
| NCL protein                                                    | IPI00183526.5 | 14 |
| NOL1/NOP2/Sun domain family 2 protein                          | IPI00306369.3 | 11 |
| Neuroblast differentiation-associated protein AHNAK (Fragme    | IPI00021812.1 | 5  |
| Non-POU domain-containing octamer-binding protein              | IPI00304596.3 | 5  |
| Nuclear migration protein nudC                                 | IPI00550746.4 | 14 |
| Nuclear pore complex protein Nup153                            | IPI00292059.1 | 3  |
| Nuclease sensitive element-binding protein 1                   | IPI00031812.1 | 23 |
| Nucleoside diphosphate kinase A                                | IPI00012048.1 | 34 |
| ORF protein                                                    | IPI00171903.1 | 17 |
| P63 protein                                                    | IPI00141318.1 | 15 |
| PREDICTED: KIAA0368 protein                                    | IPI00157790.4 | 6  |
| PREDICTED: KIAA1765 protein                                    | IPI00028196.4 | 2  |
| PREDICTED: heat shock 90kDa protein 1, alpha-like 3            | IPI00031523.2 | 19 |
| PREDICTED: similar to 60S ribosomal protein L27a               | IPI00398135.2 | 22 |
| PREDICTED: similar to Ran-specific GTPase-activating protei    | IPI00399212.1 | 15 |
| PREDICTED: similar to Ran-specific GTPase-activating protei    | IPI00399212.1 | 15 |
| Peptidyl-prolyl cis-trans isomerase A                          | IPI00419585.8 | 18 |
| Peptidyl-prolyl cis-trans isomerase B precursor                | IPI00646304.2 | 22 |
| Peroxiredoxin-1                                                | IPI00000874.1 | 28 |

|                                                             |               |    |
|-------------------------------------------------------------|---------------|----|
| Peroxiredoxin-2                                             | IPI00027350.2 | 23 |
| Peroxiredoxin-4                                             | IPI00011937.1 | 16 |
| Peroxiredoxin-4                                             | IPI00011937.1 | 16 |
| Peroxiredoxin-6                                             | IPI00220301.4 | 31 |
| Peroxisomal multifunctional enzyme type 2                   | IPI00019912.1 | 5  |
| Phosphatidylethanolamine-binding protein                    | IPI00219446.4 | 36 |
| Phosphoglycerate kinase 1                                   | IPI00169383.2 | 44 |
| Phosphoribosylformylglycinamide synthase                    | IPI00004534.3 | 13 |
| Plastin-2                                                   | IPI00010471.3 | 42 |
| Poly(rC)-binding protein 1                                  | IPI00016610.2 | 39 |
| Pre-mRNA branch site protein p14                            | IPI00032827.1 | 30 |
| Pre-mRNA-processing splicing factor 8                       | IPI00007928.4 | 4  |
| Probable ATP-dependent RNA helicase DDX5                    | IPI00017617.1 | 15 |
| Profilin-1                                                  | IPI00216691.4 | 65 |
| Programmed cell death 6-interacting protein                 | IPI00246058.4 | 7  |
| Prohibitin                                                  | IPI00017334.1 | 36 |
| Prohibitin-2                                                | IPI00027252.6 | 14 |
| Proliferating cell nuclear antigen                          | IPI00021700.3 | 37 |
| Proliferation-associated protein 2G4                        | IPI00299000.3 | 28 |
| Proliferation-inducing gene 21                              | IPI00552496.1 | 48 |
| Prostaglandin E synthase 3                                  | IPI00015029.1 | 36 |
| Proteasome activator complex subunit 2                      | IPI00384051.4 | 32 |
| Proteasome subunit alpha type 2                             | IPI00219622.2 | 23 |
| Proteasome subunit beta type (Fragment)                     | IPI00375704.1 | 28 |
| Proteasome subunit beta type 1                              | IPI00025019.3 | 20 |
| Proteasome subunit beta type 3                              | IPI00028004.2 | 23 |
| Protein C14orf166                                           | IPI00006980.1 | 18 |
| Protein disulfide-isomerase A3 precursor                    | IPI00025252.1 | 19 |
| Protein-L-isoaspartate (D-aspartate) O-methyltransferase    | IPI00024989.7 | 29 |
| Purine nucleoside phosphorylase                             | IPI00017672.3 | 19 |
| Puromycin-sensitive aminopeptidase                          | IPI00026216.4 | 9  |
| Putative eukaryotic translation initiation factor 3 subunit | IPI00024425.2 | 3  |
| RAB1A, member RAS oncogene family                           | IPI00005719.1 | 33 |
| Rab GDP dissociation inhibitor beta                         | IPI00031461.1 | 23 |
| Ran GTPase-activating protein 1                             | IPI00294879.1 | 7  |
| Ran-binding protein 2                                       | IPI00221325.3 | 1  |
| Ras GTPase-activating-like protein IQGAP1                   | IPI00009342.1 | 14 |
| Ras-related protein Rab-7                                   | IPI00016342.1 | 18 |
| Ras-related protein Rap-1b precursor                        | IPI00015148.3 | 21 |
| RcTPI1 (Fragment)                                           | IPI00383071.1 | 32 |
| Ribonuclease inhibitor                                      | IPI00550069.2 | 20 |
| Ribonucleases P/MRP protein subunit POP1                    | IPI00293331.3 | 8  |
| Ribonucleoside-diphosphate reductase large subunit          | IPI00013871.1 | 17 |
| Ribosomal pRotein L15; 60S Ribosomal pRotein L15            | IPI00375511.4 | 17 |
| RuvB-like 1                                                 | IPI00021187.3 | 18 |
| S-adenosylmethionine synthetase isoform type-2              | IPI00010157.1 | 14 |
| Sepiapterin reductase                                       | IPI00017469.1 | 27 |

|                                                             |               |    |
|-------------------------------------------------------------|---------------|----|
| Serine hydroxymethyltransferase, mitochondrial precursor    | IPI00002520.1 | 25 |
| Serine-threonine kinase receptor-associated protein         | IPI00294536.1 | 14 |
| Serine/threonine-protein phosphatase 2A catalytic subunit a | IPI00008380.1 | 18 |
| Signal recognition particle 14 kDa protein                  | IPI00293434.1 | 15 |
| Signal recognition particle 72 kDa protein                  | IPI00215888.3 | 8  |
| Signal recognition particle receptor beta subunit           | IPI00295098.3 | 29 |
| Similar to Clathrin heavy chain                             | IPI00024067.2 | 16 |
| Similar to Eukaryotic translation initiation factor 4GI     | IPI00220365.3 | 5  |
| Similar to Ras-related protein Rab-5C                       | IPI00016339.3 | 16 |
| Splice Isoform 1 of Calcyclin-binding protein               | IPI00395627.3 | 37 |
| Splice Isoform 1 of Chromodomain helicase-DNA-binding prote | IPI00000846.1 | 3  |
| Splice Isoform 1 of Clathrin heavy chain 2                  | IPI00022881.1 | 6  |
| Splice Isoform 1 of Cullin-associated NEDD8-dissociated pro | IPI00100160.3 | 15 |
| Splice Isoform 1 of DNA-dependent protein kinase catalytic  | IPI00296337.2 | 9  |
| Splice Isoform 1 of Elongation factor Ts, mitochondrial pre | IPI00021016.3 | 18 |
| Splice Isoform 1 of F-actin capping protein beta subunit    | IPI00026185.5 | 21 |
| Splice Isoform 1 of Far upstream element-binding protein 3  | IPI00377261.1 | 8  |
| Splice Isoform 1 of Filamin-B                               | IPI00289334.1 | 12 |
| Splice Isoform 1 of Filamin-C                               | IPI00178352.3 | 1  |
| Splice Isoform 1 of General transcription factor II-I       | IPI00054042.1 | 3  |
| Splice Isoform 1 of Glucosamine--fructose-6-phosphate amino | IPI00217952.6 | 11 |
| Splice Isoform 1 of Glucosamine--fructose-6-phosphate amino | IPI00217952.6 | 11 |
| Splice Isoform 1 of Golgin subfamily A member 2             | IPI00156651.1 | 8  |
| Splice Isoform 1 of Heat shock cognate 71 kDa protein       | IPI00003865.1 | 38 |
| Splice Isoform 1 of Heterogeneous nuclear ribonucleoprotein | IPI00028888.1 | 10 |
| Splice Isoform 1 of Heterogeneous nuclear ribonucleoprotein | IPI00216049.1 | 38 |
| Splice Isoform 1 of Importin-4                              | IPI00156374.4 | 4  |
| Splice Isoform 1 of Importin-alpha re-exporter              | IPI00022744.5 | 17 |
| Splice Isoform 1 of Isocitrate dehydrogenase [NAD] subunit  | IPI00030702.1 | 20 |
| Splice Isoform 1 of Keratin, type I cytoskeletal 13         | IPI00009866.6 | 5  |
| Splice Isoform 1 of Kinectin                                | IPI00328753.1 | 5  |
| Splice Isoform 1 of La-related protein 1                    | IPI00185919.3 | 4  |
| Splice Isoform 1 of Mitochondrial inner membrane protein    | IPI00009960.6 | 13 |
| Splice Isoform 1 of Myb-binding protein 1A                  | IPI00005024.3 | 3  |
| Splice Isoform 1 of Nuclear autoantigenic sperm protein     | IPI00179953.2 | 11 |
| Splice Isoform 1 of Plectin 1                               | IPI00014898.1 | 3  |
| Splice Isoform 1 of Polyadenylate-binding protein 1         | IPI00008524.1 | 19 |
| Splice Isoform 1 of Polypyrimidine tract-binding protein 1  | IPI00179964.5 | 18 |
| Splice Isoform 1 of Polypyrimidine tract-binding protein 1  | IPI00179964.5 | 18 |
| Splice Isoform 1 of Probable ATP-dependent RNA helicase DDX | IPI00023785.5 | 6  |
| Splice Isoform 1 of Probable mitochondrial import receptor  | IPI00014053.3 | 12 |
| Splice Isoform 1 of Proteasome activator complex subunit 3  | IPI00030243.1 | 28 |
| Splice Isoform 1 of Protein KIAA1967                        | IPI00182757.9 | 11 |
| Splice Isoform 1 of Protein arginine N-methyltransferase 1  | IPI00018522.3 | 17 |

|                                                                          |               |    |
|--------------------------------------------------------------------------|---------------|----|
| Splice Isoform 1 of Spectrin alpha chain, brain                          | IPI00413728.2 | 4  |
| Splice Isoform 1 of Structural maintenance of chromosome 2-              | IPI00007927.3 | 5  |
| Splice Isoform 1 of Surfeit locus protein 4                              | IPI00005737.1 | 14 |
| Splice Isoform 1 of Transcription intermediary factor 1-beta             | IPI00438229.1 | 22 |
| Splice Isoform 1 of Ubiquitin ligase protein BRE1B                       | IPI00162563.5 | 5  |
| Splice Isoform 1 of Ubiquitin-conjugating enzyme E2 variant              | IPI00019599.1 | 14 |
| Splice Isoform 1 of Uridine phosphorylase 1                              | IPI00004406.1 | 25 |
| Splice Isoform 1 of Uridine phosphorylase 1                              | IPI00004406.1 | 25 |
| Splice Isoform 1 of Voltage-dependent anion-selective channel            | IPI00024145.1 | 34 |
| Splice Isoform 1 of Voltage-dependent anion-selective channel            | IPI00031804.1 | 43 |
| Splice Isoform 2 of DNA replication licensing factor MCM7                | IPI00219740.3 | 12 |
| Splice Isoform 2 of Double-stranded RNA-specific adenosine               | IPI00025057.1 | 4  |
| Splice Isoform 2 of Far upstream element-binding protein 1               | IPI00163782.2 | 7  |
| Splice Isoform 2 of HECT, UBA and WWE domain-containing protein          | IPI00445401.2 | 1  |
| Splice Isoform 2 of Microtubule-associated protein 4                     | IPI00220113.1 | 5  |
| Splice Isoform 2 of NMDA receptor-regulated protein 1                    | IPI00032158.2 | 14 |
| Splice Isoform 2 of Nuclear mitotic apparatus protein 1                  | IPI00006196.2 | 4  |
| Splice Isoform 2 of Nucleophosmin                                        | IPI00220740.1 | 24 |
| Splice Isoform 2 of Structural maintenance of chromosomes 4              | IPI00328298.6 | 6  |
| Splice Isoform 2 of Triosephosphate isomerase                            | IPI00451401.2 | 27 |
| Splice Isoform 3 of Ribosome-binding protein 1                           | IPI00215743.2 | 8  |
| Splice Isoform 3 of UDP-N-acetylglucosamine--peptide N-acetyltransferase | IPI00005780.3 | 5  |
| Splice Isoform 4 of Apoptosis inhibitor 5                                | IPI00006684.2 | 10 |
| Splice Isoform 5 of Dynamin-1-like protein                               | IPI00037283.2 | 11 |
| Splice Isoform 5 of Interleukin enhancer-binding factor 3                | IPI00219330.2 | 5  |
| Splice Isoform 5 of Interleukin enhancer-binding factor 3                | IPI00219330.2 | 5  |
| Splice Isoform A of Lamin-A/C                                            | IPI00021405.3 | 11 |
| Splice Isoform A of Phosphate carrier protein, mitochondria              | IPI00022202.3 | 15 |
| Splice Isoform AGX2 of UDP-N-acetylhexosamine pyrophosphorylase          | IPI00000684.4 | 11 |
| Splice Isoform B of Smoothelin                                           | IPI00024007.2 | 5  |
| Splice Isoform B1 of Heterogeneous nuclear ribonucleoprotein             | IPI00396378.3 | 14 |
| Splice Isoform Beta of Heat-shock protein 105 kDa                        | IPI00218993.1 | 8  |
| Splice Isoform Beta-1C of Integrin beta-1 precursor                      | IPI00217561.1 | 6  |
| Splice Isoform C1 of Heterogeneous nuclear ribonucleoprotein             | IPI00216592.1 | 9  |
| Splice Isoform D of Protein C9orf10                                      | IPI00039626.3 | 4  |
| Splice Isoform DPI of Desmoplakin                                        | IPI00013933.1 | 2  |
| Splice Isoform DUT-M of Deoxyuridine 5'-triphosphate nucleoside          | IPI00013679.1 | 19 |
| Splice Isoform Gamma-1 of Serine/threonine-protein phosphatase           | IPI00005705.1 | 22 |
| Splice Isoform Long of Delta 1-pyrroline-5-carboxylate synthetase        | IPI00008982.1 | 20 |
| Splice Isoform Long of Double-stranded RNA-binding protein               | IPI00000001.1 | 8  |
| Splice Isoform Long of Heterogeneous nuclear ribonucleoprotein           | IPI00025054.1 | 19 |
| Splice Isoform Long of Sodium/potassium-transporting ATPase              | IPI00006482.1 | 8  |

|                                                             |               |    |
|-------------------------------------------------------------|---------------|----|
| Splice Isoform Long of Trifunctional purine biosynthetic pr | IPI00025273.1 | 14 |
| Splice Isoform Long of Ubiquitin carboxyl-terminal hydrolas | IPI00024664.1 | 7  |
| Splice Isoform SERCA1B of Sarcoplasmic/endoplasmic reticulu | IPI00024804.3 | 7  |
| Splice Isoform SERCA2A of Sarcoplasmic/endoplasmic reticulu | IPI00177817.4 | 5  |
| Splicing coactivator subunit SRm300                         | IPI00099730.3 | 2  |
| Splicing factor 3B subunit 1                                | IPI00026089.3 | 6  |
| Splicing factor 3B subunit 3                                | IPI00300371.3 | 14 |
| Src substrate cortactin                                     | IPI00029601.3 | 8  |
| Staphylococcal nuclease domain-containing protein 1         | IPI00140420.4 | 20 |
| Stomatin-like protein 2                                     | IPI00334190.4 | 17 |
| Stress-70 protein, mitochondrial precursor                  | IPI00007765.5 | 42 |
| Stress-induced-phosphoprotein 1                             | IPI00013894.1 | 25 |
| T-complex protein 1 subunit alpha                           | IPI00290566.1 | 27 |
| T-complex protein 1 subunit beta                            | IPI00297779.6 | 33 |
| T-complex protein 1 subunit delta                           | IPI00302927.5 | 24 |
| T-complex protein 1 subunit epsilon                         | IPI00010720.1 | 14 |
| T-complex protein 1 subunit eta                             | IPI00018465.1 | 20 |
| T-complex protein 1 subunit theta                           | IPI00302925.3 | 23 |
| T-complex protein 1 subunit zeta                            | IPI00027626.2 | 13 |
| TALDO1 protein                                              | IPI00550488.2 | 14 |
| TAR DNA-binding protein 43                                  | IPI00025815.1 | 9  |
| TOB3                                                        | IPI00045921.1 | 7  |
| TUBA6 protein                                               | IPI00166768.2 | 33 |
| Talin-1                                                     | IPI00298994.4 | 9  |
| Thioredoxin domain-containing protein 5 precursor           | IPI00171438.2 | 7  |
| Thioredoxin-dependent peroxide reductase, mitochondrial pre | IPI00024919.3 | 15 |
| Threonyl-tRNA synthetase, cytoplasmic                       | IPI00329633.5 | 18 |
| Threonyl-tRNA synthetase, cytoplasmic                       | IPI00329633.5 | 18 |
| Transcription elongation factor B polypeptide 1             | IPI00300341.5 | 30 |
| Transferrin receptor protein 1                              | IPI00022462.1 | 16 |
| Transgelin-2                                                | IPI00550363.2 | 21 |
| Transitional endoplasmic reticulum ATPase                   | IPI00022774.2 | 17 |
| Transketolase                                               | IPI00021716.1 | 18 |
| Translocated promoter region                                | IPI00022970.3 | 10 |
| Transmembrane protein 33                                    | IPI00299084.1 | 17 |
| Trifunctional enzyme alpha subunit, mitochondrial precursor | IPI00031522.2 | 19 |
| Trifunctional enzyme beta subunit, mitochondrial precursor  | IPI00022793.4 | 6  |
| Tubulin alpha-1 chain                                       | IPI00007750.1 | 41 |
| Tubulin beta-1 chain                                        | IPI00006510.1 | 6  |
| Tubulin beta-2 chain                                        | IPI00011654.2 | 23 |
| Tubulin beta-2C chain                                       | IPI00007752.1 | 66 |
| Tumor protein, translationally-controlled 1                 | IPI00009943.2 | 14 |
| Tyrosyl-tRNA synthetase, cytoplasmic                        | IPI00007074.4 | 6  |
| U5 small nuclear ribonucleoprotein 200 kDa helicase         | IPI00420014.2 | 5  |
| Ubiquinol-cytochrome-c reductase complex core protein 2,    | IPI00305383.1 | 10 |

|                                                             |                  |                   |
|-------------------------------------------------------------|------------------|-------------------|
| mi                                                          |                  |                   |
| Ubiquinol-cytochrome-c reductase complex core protein 2, mi | IPI00305383.1    | 10                |
| Ubiquinol-cytochrome-c reductase complex core protein I, mi | IPI00013847.3    | 12                |
| Ubiquitin carboxyl-terminal hydrolase 14                    | IPI00219913.9    | 8                 |
| Ubiquitin carboxyl-terminal hydrolase 7                     | IPI00003965.4    | 7                 |
| Ubiquitin-activating enzyme E1                              | IPI00026119.6    | 20                |
| Ubiquitin-activating enzyme E1                              | IPI00552452.1    | 21                |
| Ubiquitin-activating enzyme E1                              | IPI00645078.1    | 11                |
| Ubiquitin-conjugating enzyme E2 L3                          | IPI00021347.1    | 30                |
| WUGSC:H_RG054D04.1 protein                                  | IPI00011457.1    | 14                |
| Zyxin                                                       | IPI00020513.2    | 15                |
| chaperonin containing TCP1, subunit 3 isoform b             | IPI00290770.3    | 19                |
| cytochrome b5 outer mitochondrial membrane precursor        | IPI00303954.3    | 37                |
| eukaryotic translation initiation factor 4 gamma, 1 isoform | IPI00384463.3    | 3                 |
| glutathione S-transferase M4 isoform 1                      | IPI00008770.1    | 20                |
| heterogeneous nuclear ribonucleoprotein D-like              | IPI00011274.1    | 13                |
| heterogeneous nuclear ribonucleoprotein H1                  | IPI00013881.5    | 26                |
| heterogeneous nuclear ribonucleoprotein L isoform a         | IPI00027834.3    | 11                |
| hypothetical protein LOC286077                              | IPI00394829.2    | 4                 |
| hypothetical protein LOC345651                              | IPI00003269.1    | 12                |
| lactate dehydrogenase A                                     | IPI00217966.6    | 30                |
| methylenetetrahydrofolate dehydrogenase (NADP+ dependent) 1 | IPI00291646.2    | 6                 |
| poly(rC)-binding protein 2 isoform b                        | IPI00012066.1    | 29                |
| pyruvate kinase 3 isoform 2                                 | IPI00220644.6    | 48                |
| smooth muscle and non-muscle myosin alkali light chain isof | IPI00066374.1    | 21                |
| thymopoietin isoform beta                                   | IPI00030131.2    | 16                |
| vinculin isoform VCL                                        | IPI00291175.5    | 7                 |
| <b>50 <math>\mu</math>M AI-HNE</b>                          |                  |                   |
| <b>Protein</b>                                              | <b>Accession</b> | <b>% Coverage</b> |
| 1-phosphatidylinositol-4,5-bisphosphate phosphodiesterase b | IPI00010400.1    | 5                 |
| 116 kDa U5 small nuclear ribonucleoprotein component        | IPI00003519.1    | 6                 |
| 130 kDa leucine-rich protein                                | IPI00329745.4    | 19                |
| 130 kDa protein                                             | IPI00082831.3    | 4                 |
| 14-3-3 protein beta/alpha                                   | IPI00216318.4    | 34                |
| 14-3-3 protein epsilon                                      | IPI00000816.1    | 53                |
| 14-3-3 protein gamma                                        | IPI00220642.6    | 22                |
| 14-3-3 protein sigma                                        | IPI00013890.1    | 28                |
| 14-3-3 protein theta                                        | IPI00018146.1    | 36                |
| 14-3-3 protein zeta/delta                                   | IPI00021263.3    | 42                |
| 150 kDa oxygen-regulated protein precursor                  | IPI00000877.1    | 9                 |
| 19 kDa protein                                              | IPI00027388.5    | 19                |
| 2'-phosphodiesterase                                        | IPI00174390.2    | 12                |
| 2,4-dienoyl-CoA reductase, mitochondrial precursor          | IPI00003482.1    | 19                |
| 26S protease regulatory subunit 4                           | IPI00011126.6    | 18                |
| 26S protease regulatory subunit 7                           | IPI00021435.2    | 24                |

|                                                    |               |    |
|----------------------------------------------------|---------------|----|
| 26S proteasome non-ATPase regulatory subunit 12    | IPI00185374.3 | 11 |
| 26S proteasome non-ATPase regulatory subunit 2     | IPI00012268.2 | 27 |
| 26S proteasome non-ATPase regulatory subunit 3     | IPI00011603.2 | 12 |
| 26S proteasome non-ATPase regulatory subunit 5     | IPI00002134.3 | 11 |
| 29 kDa protein                                     | IPI00015139.3 | 21 |
| 29 kDa protein                                     | IPI00178083.2 | 21 |
| 29 kDa protein                                     | IPI00453476.2 | 28 |
| 3-mercaptopyruvate sulfurtransferase               | IPI00165360.4 | 14 |
| 31 kDa protein                                     | IPI00374686.2 | 9  |
| 39 kDa protein                                     | IPI00334627.2 | 43 |
| 40S ribosomal protein S11                          | IPI00025091.1 | 24 |
| 40S ribosomal protein S14                          | IPI00026271.4 | 31 |
| 40S ribosomal protein S15a                         | IPI00221091.7 | 33 |
| 40S ribosomal protein S16                          | IPI00221092.7 | 29 |
| 40S ribosomal protein S17                          | IPI00221093.6 | 40 |
| 40S ribosomal protein S2                           | IPI00013485.3 | 13 |
| 40S ribosomal protein S21                          | IPI00017448.1 | 34 |
| 40S ribosomal protein S25                          | IPI00012750.3 | 16 |
| 40S ribosomal protein S3                           | IPI00011253.2 | 52 |
| 40S ribosomal protein S4, X isoform                | IPI00217030.9 | 25 |
| 40S ribosomal protein S5                           | IPI00008433.3 | 29 |
| 40S ribosomal protein S6                           | IPI00021840.1 | 21 |
| 40S ribosomal protein S8                           | IPI00216587.8 | 38 |
| 40S ribosomal protein S9                           | IPI00221088.4 | 19 |
| 42 kDa protein                                     | IPI00164375.6 | 9  |
| 47 kDa heat shock protein precursor                | IPI00019880.1 | 15 |
| 4F2 cell-surface antigen heavy chain               | IPI00027493.1 | 12 |
| 50 kDa protein                                     | IPI00246022.3 | 8  |
| 53 kDa protein                                     | IPI00172579.3 | 9  |
| 6-phosphogluconate dehydrogenase, decarboxylating  | IPI00219525.9 | 25 |
| 6-phosphogluconolactonase                          | IPI00029997.1 | 19 |
| 60 kDa heat shock protein, mitochondrial precursor | IPI00472102.2 | 48 |
| 60 kDa protein                                     | IPI00220480.6 | 14 |
| 60S acidic ribosomal protein P0                    | IPI00008530.1 | 50 |
| 60S ribosomal protein L12                          | IPI00024933.3 | 43 |
| 60S ribosomal protein L18                          | IPI00215719.5 | 20 |
| 60S ribosomal protein L18a                         | IPI00026202.1 | 21 |
| 60S ribosomal protein L19                          | IPI00025329.1 | 14 |
| 60S ribosomal protein L22                          | IPI00219153.3 | 39 |
| 60S ribosomal protein L23                          | IPI00010153.5 | 25 |
| 60S ribosomal protein L3                           | IPI00550021.3 | 21 |
| 60S ribosomal protein L30                          | IPI00219156.6 | 35 |
| 60S ribosomal protein L4                           | IPI00003918.4 | 29 |
| 60S ribosomal protein L5                           | IPI00000494.5 | 20 |
| 60S ribosomal protein L6                           | IPI00329389.5 | 23 |
| 60S ribosomal protein L8                           | IPI00012772.7 | 19 |
| 60S ribosomal protein L9                           | IPI00031691.1 | 31 |

|                                                             |                |    |
|-------------------------------------------------------------|----------------|----|
| 78 kDa glucose-regulated protein precursor                  | IPI00003362.1  | 46 |
| 93 kDa protein                                              | IPI00177366.2  | 18 |
| ADP-ribosylation factor 1                                   | IPI00215914.4  | 55 |
| ADP-ribosylation factor 4                                   | IPI00215918.2  | 22 |
| ADP/ATP translocase 2                                       | IPI00007188.4  | 28 |
| ALB protein                                                 | IPI00022434.2  | 5  |
| ATP synthase B chain, mitochondrial precursor               | IPI00029133.4  | 22 |
| ATP synthase O subunit, mitochondrial precursor             | IPI00007611.1  | 24 |
| ATP synthase alpha chain, mitochondrial precursor           | IPI00440493.2  | 37 |
| ATP synthase beta chain, mitochondrial precursor            | IPI00303476.1  | 17 |
| ATP synthase, H+ transporting, mitochondrial F0 complex, su | IPI00219291.2  | 27 |
| ATP synthase, H+ transporting, mitochondrial F0 complex, su | IPI00220487.3  | 28 |
| ATP-binding cassette sub-family E member 1                  | IPI00303207.3  | 9  |
| ATP-citrate synthase                                        | IPI00021290.4  | 23 |
| ATP-dependent DNA helicase II 80 kDa subunit                | IPI00220834.7  | 15 |
| ATP-dependent DNA helicase Q1                               | IPI00178431.11 | 6  |
| ATP-dependent RNA helicase DDX3X                            | IPI00215637.4  | 16 |
| Acetyl-CoA acetyltransferase, mitochondrial precursor       | IPI00030363.1  | 16 |
| Acidic leucine-rich nuclear phosphoprotein 32 family member | IPI00007423.1  | 16 |
| Actin, aortic smooth muscle                                 | IPI00008603.1  | 27 |
| Actin, cytoplasmic 1                                        | IPI00021439.1  | 39 |
| Actin-like protein 2                                        | IPI00005159.3  | 13 |
| Activator of 90 kDa heat shock protein ATPase homolog 1     | IPI00030706.1  | 18 |
| Adenosylhomocysteinase                                      | IPI00012007.5  | 12 |
| Adenylyl cyclase-associated protein 1                       | IPI00008274.5  | 25 |
| Alanyl-tRNA synthetase                                      | IPI00027442.3  | 22 |
| Aldehyde dehydrogenase, mitochondrial precursor             | IPI00006663.1  | 28 |
| Alpha-actinin-1                                             | IPI00013508.4  | 44 |
| Alpha-actinin-4                                             | IPI00013808.1  | 20 |
| Alpha-enolase                                               | IPI00465248.4  | 39 |
| Alpha-enolase, lung specific                                | IPI00013769.1  | 12 |
| Amidophosphoribosyltransferase precursor                    | IPI00029534.1  | 8  |
| Annexin A5                                                  | IPI00329801.11 | 49 |
| Arginyl-tRNA synthetase                                     | IPI00004860.2  | 11 |
| Aspartate aminotransferase, mitochondrial precursor         | IPI00018206.3  | 31 |
| Aspartyl-tRNA synthetase                                    | IPI00216951.2  | 17 |
| B cell lymphoma/leukemia 10                                 | IPI00022477.1  | 23 |
| BAG family molecular chaperone regulator 2                  | IPI00000643.1  | 24 |
| BRCA2 and CDKN1A-interacting protein, isoform BCCIPbeta     | IPI00002203.5  | 24 |
| Bifunctional purine biosynthesis protein PURH               | IPI00289499.3  | 18 |
| Biliverdin reductase A precursor                            | IPI00294158.1  | 13 |
| C-1-tetrahydrofolate synthase, cytoplasmic                  | IPI00218342.9  | 12 |
| CAD protein                                                 | IPI00301263.2  | 5  |
| CDNA FLJ13369 fis, clone PLACE1000610, weakly similar to MS | IPI00549861.2  | 10 |
| CDNA FLJ34068 fis, clone FCBBF3001918, highly similar to SE | IPI00168184.6  | 28 |
| CDNA FLJ45525 fis, clone BRTHA2026311, highly similar to    | IPI00299571.4  | 12 |



|                                                             |               |    |
|-------------------------------------------------------------|---------------|----|
| Pr                                                          |               |    |
| CDNA FLJ45706 fis, clone FEBRA2028457, highly similar to Nu | IPI00444262.1 | 12 |
| CDNA FLJ46672 fis, clone TRACH3009008, highly similar to Th | IPI00472175.1 | 20 |
| COP9 signalosome complex subunit 7a                         | IPI00301419.2 | 19 |
| CTP synthase                                                | IPI00290142.5 | 17 |
| Calnexin precursor                                          | IPI00020984.1 | 16 |
| Calpain-2 catalytic subunit precursor                       | IPI00289758.5 | 5  |
| Calponin-2                                                  | IPI00015262.9 | 14 |
| Calponin-3                                                  | IPI00216682.5 | 19 |
| Calreticulin precursor                                      | IPI00020599.1 | 16 |
| Carbonyl reductase [NADPH] 1                                | IPI00295386.6 | 21 |
| Cargo selection protein TIP47                               | IPI00106668.3 | 30 |
| Casein kinase II subunit alpha'                             | IPI00020602.1 | 9  |
| Chloride intracellular channel protein 1                    | IPI00010896.2 | 52 |
| Chromobox protein homolog 1                                 | IPI00010320.1 | 9  |
| Chromobox protein homolog 3                                 | IPI00297579.3 | 21 |
| Chromosome 9 open reading frame 32                          | IPI00515040.1 | 21 |
| Chronic myelogenous leukemia tumor antigen 66               | IPI00306398.5 | 8  |
| Citrate synthase, mitochondrial precursor                   | IPI00025366.4 | 8  |
| Coatomer subunit alpha                                      | IPI00295857.6 | 3  |
| Coatomer subunit beta                                       | IPI00295851.3 | 4  |
| Coatomer subunit gamma                                      | IPI00001890.7 | 7  |
| Cofilin, non-muscle isoform                                 | IPI00012011.4 | 43 |
| Coiled-coil-helix-coiled-coil-helix domain-containing prote | IPI00015833.1 | 28 |
| Copine-3                                                    | IPI00024403.1 | 20 |
| Coproporphyrinogen III oxidase, mitochondrial precursor     | IPI00093057.6 | 15 |
| Coronin-1C                                                  | IPI00008453.3 | 21 |
| Crk-like protein                                            | IPI00004839.1 | 21 |
| Cysteine and histidine-rich domain (CHORD)-containing, zinc | IPI00015897.2 | 16 |
| Cytokeratin type II                                         | IPI00005859.1 | 6  |
| Cytoplasmic dynein 1 light intermediate chain 1             | IPI00007675.5 | 10 |
| D-3-phosphoglycerate dehydrogenase                          | IPI00011200.4 | 13 |
| DEAH (Asp-Glu-Ala-His) box polypeptide 9 isoform 1          | IPI00215638.4 | 10 |
| DEAH (Asp-Glu-Ala-His) box polypeptide 9 isoform 2          | IPI00155723.3 | 24 |
| DJ1014D13.1 protein                                         | IPI00465233.1 | 14 |
| DNA damage-binding protein 1                                | IPI00293464.4 | 7  |
| DNA mismatch repair protein Msh2                            | IPI00017303.1 | 9  |
| DNA replication licensing factor MCM2                       | IPI00184330.5 | 10 |
| DNA replication licensing factor MCM4                       | IPI00018349.5 | 11 |
| DNA replication licensing factor MCM6                       | IPI00031517.1 | 16 |
| DNA-(apurinic or apyrimidinic site) lyase                   | IPI00215911.2 | 18 |
| Dihydrolipoyl dehydrogenase, mitochondrial precursor        | IPI00015911.1 | 19 |
| DnaJ homolog subfamily A member 1                           | IPI00012535.1 | 18 |
| Dolichyl-diphosphooligosaccharide--protein glycosyltransfer | IPI00025874.1 | 30 |
| Drebrin                                                     | IPI00003406.2 | 20 |
| Dynactin 2 variant (Fragment)                               | IPI00220503.8 | 16 |

|                                                             |               |    |
|-------------------------------------------------------------|---------------|----|
| Dynein heavy chain, cytosolic                               | IPI00456969.1 | 3  |
| Dynein light chain 1, cytoplasmic                           | IPI00019329.1 | 49 |
| EEF1A1 protein                                              | IPI00025447.6 | 28 |
| ELAV-like protein 1                                         | IPI00301936.3 | 16 |
| ENO1P protein                                               | IPI00328587.4 | 10 |
| ERO1-like protein alpha precursor                           | IPI00386755.2 | 10 |
| Early endosome antigen 1                                    | IPI00329536.1 | 8  |
| Electron transfer flavoprotein alpha-subunit, mitochondrial | IPI00010810.1 | 14 |
| Elongation factor 1-alpha 2                                 | IPI00014424.1 | 18 |
| Elongation factor 1-beta                                    | IPI00178440.2 | 21 |
| Elongation factor 1-delta                                   | IPI00023048.3 | 31 |
| Elongation factor 1-gamma                                   | IPI00000875.5 | 27 |
| Elongation factor 2                                         | IPI00186290.5 | 51 |
| Elongation factor Tu GTP binding domain containing 1        | IPI00293026.5 | 5  |
| Elongation factor Tu, mitochondrial precursor               | IPI00027107.4 | 18 |
| Emerin                                                      | IPI00032003.1 | 24 |
| Endoplasmic precursor                                       | IPI00027230.3 | 24 |
| Enoyl-CoA hydratase, mitochondrial precursor                | IPI00024993.4 | 36 |
| Eukaryotic initiation factor 4A-I                           | IPI00025491.1 | 38 |
| Eukaryotic initiation factor 5A isoform I variant A         | IPI00376005.1 | 22 |
| Eukaryotic peptide chain release factor subunit 1           | IPI00429191.2 | 8  |
| Eukaryotic translation initiation factor 2 subunit 1        | IPI00219678.2 | 14 |
| Eukaryotic translation initiation factor 3 subunit 10       | IPI00029012.1 | 8  |
| Eukaryotic translation initiation factor 3 subunit 12       | IPI00033143.1 | 14 |
| Eukaryotic translation initiation factor 3 subunit 5        | IPI00011257.1 | 12 |
| Eukaryotic translation initiation factor 3 subunit 7        | IPI00006181.1 | 9  |
| Eukaryotic translation initiation factor 6                  | IPI00010105.1 | 29 |
| Exportin-1                                                  | IPI00298961.3 | 12 |
| Ezrin                                                       | IPI00479359.5 | 7  |
| F-actin capping protein alpha-1 subunit                     | IPI00005969.1 | 21 |
| FK506-binding protein 4                                     | IPI00219005.2 | 35 |
| Family with sequence similarity 62 (C2 domain containing),  | IPI00022143.3 | 20 |
| Far upstream element-binding protein 2                      | IPI00298363.2 | 26 |
| Fascin                                                      | IPI00163187.9 | 13 |
| Fatty acid synthase                                         | IPI00026781.2 | 23 |
| Fatty acid-binding protein, epidermal                       | IPI00007797.2 | 63 |
| Filamin A, alpha                                            | IPI00302592.2 | 33 |
| Fragile X mental retardation syndrome-related protein 1     | IPI00016249.1 | 11 |
| Fructose-bisphosphate aldolase A                            | IPI00465439.4 | 54 |
| Fructose-bisphosphate aldolase C                            | IPI00418262.3 | 15 |
| G1 to S phase transition protein 1 homolog                  | IPI00218829.7 | 6  |
| G22P1 protein                                               | IPI00465430.4 | 10 |
| GARS protein                                                | IPI00465260.3 | 22 |
| GCN1-like protein 1                                         | IPI00001159.8 | 7  |
| GDP-L-fucose synthetase                                     | IPI00014361.1 | 22 |
| GMP synthase                                                | IPI00029079.5 | 21 |
| GPI-anchored protein p137                                   | IPI00030910.1 | 7  |

|                                                          |                |    |
|----------------------------------------------------------|----------------|----|
| GTP-binding nuclear protein RAN                          | IPI00012507.3  | 32 |
| Galectin-1                                               | IPI00219219.2  | 31 |
| Gamma-enolase                                            | IPI00216171.2  | 13 |
| Glucosamine 6-phosphate N-acetyltransferase              | IPI00061525.3  | 30 |
| Glucose-6-phosphate isomerase                            | IPI00027497.4  | 22 |
| Glutaredoxin-1                                           | IPI00219025.2  | 31 |
| Glutathione S-transferase P                              | IPI00219757.12 | 58 |
| Glutathione transferase omega-1                          | IPI00019755.3  | 15 |
| Glyceraldehyde-3-phosphate dehydrogenase                 | IPI00219018.6  | 66 |
| GrpE protein homolog 1, mitochondrial precursor          | IPI00029557.3  | 12 |
| Guanine nucleotide-binding protein G(k), alpha subunit   | IPI00220578.2  | 12 |
| Guanine nucleotide-binding protein beta subunit 2-like 1 | IPI00641950.1  | 14 |
| HADH2 protein                                            | IPI00017726.1  | 80 |
| HBxAg transactivated protein 2                           | IPI00083708.2  | 3  |
| HDCMD34P                                                 | IPI00001672.1  | 26 |
| HNRPA2B1 protein                                         | IPI00386854.5  | 23 |
| HNRPF protein                                            | IPI00003881.5  | 18 |
| Heat shock 70 kDa protein 1                              | IPI00304925.3  | 21 |
| Heat shock 70 kDa protein 1L                             | IPI00301277.1  | 15 |
| Heat shock 70 kDa protein 4                              | IPI00002966.1  | 37 |
| Heat shock 70 kDa protein 4L                             | IPI00295485.1  | 20 |
| Heat shock protein 75 kDa, mitochondrial precursor       | IPI00030275.5  | 15 |
| Heat shock protein HSP 90-alpha 2                        | IPI00382470.2  | 16 |
| Heat-shock protein beta-1                                | IPI00025512.2  | 64 |
| Hepatoma-derived growth factor                           | IPI00020956.1  | 23 |
| Heterogeneous nuclear ribonucleoprotein C-like 1         | IPI00027569.1  | 11 |
| Heterogeneous nuclear ribonucleoprotein R                | IPI00012074.3  | 9  |
| High mobility group protein 1-like 10                    | IPI00018755.1  | 16 |
| Histidyl-tRNA synthetase                                 | IPI00021808.3  | 8  |
| Histone H1.2                                             | IPI00217465.4  | 16 |
| Histone H2B.q                                            | IPI00003935.5  | 12 |
| Histone H4                                               | IPI00453473.5  | 28 |
| Histone acetyltransferase type B catalytic subunit       | IPI00024719.1  | 9  |
| Histone deacetylase 1                                    | IPI00013774.1  | 12 |
| Hsp90 co-chaperone Cdc37                                 | IPI00013122.1  | 18 |
| Hypothetical protein                                     | IPI00007102.2  | 11 |
| Hypothetical protein DCUN1D5                             | IPI00165361.3  | 14 |
| Hypothetical protein DKFZp313B047                        | IPI00013452.8  | 13 |
| Hypothetical protein DKFZp451D234                        | IPI00031583.2  | 5  |
| Hypothetical protein DKFZp686I04222                      | IPI00413451.1  | 22 |
| Hypothetical protein DKFZp761K0511                       | IPI00334775.5  | 39 |
| Hypothetical protein DKFZp779B0247                       | IPI00398121.5  | 11 |
| Hypothetical protein EIF3S9                              | IPI00334191.5  | 11 |
| Hypothetical protein LRRC59                              | IPI00396321.1  | 12 |
| Hypothetical protein MGC70857                            | IPI00166638.2  | 12 |
| Hypoxanthine-guanine phosphoribosyltransferase           | IPI00218493.6  | 41 |
| IARS protein                                             | IPI00013234.2  | 8  |

|                                                             |               |    |
|-------------------------------------------------------------|---------------|----|
| Importin alpha-2 subunit                                    | IPI00002214.1 | 14 |
| Importin beta-1 subunit                                     | IPI00001639.2 | 14 |
| Importin beta-2 subunit                                     | IPI00024364.2 | 10 |
| Importin beta-3                                             | IPI00329200.5 | 16 |
| Importin-9                                                  | IPI00185146.4 | 6  |
| Inorganic pyrophosphatase                                   | IPI00015018.1 | 26 |
| Inosine-5'-monophosphate dehydrogenase 2                    | IPI00291510.3 | 20 |
| Interferon-induced 17 kDa protein precursor                 | IPI00375631.5 | 24 |
| Interleukin enhancer-binding factor 2                       | IPI00005198.2 | 16 |
| Keratin, type I cytoskeletal 10                             | IPI00009865.1 | 41 |
| Keratin, type I cytoskeletal 14                             | IPI00384444.4 | 16 |
| Keratin, type I cytoskeletal 16                             | IPI00217963.2 | 10 |
| Keratin, type I cytoskeletal 9                              | IPI00019359.3 | 47 |
| Keratin, type II cytoskeletal 1                             | IPI00220327.2 | 47 |
| Keratin, type II cytoskeletal 2 epidermal                   | IPI00021304.1 | 45 |
| Keratin, type II cytoskeletal 5                             | IPI00009867.2 | 12 |
| Kinesin heavy chain                                         | IPI00012837.1 | 15 |
| L-lactate dehydrogenase B chain                             | IPI00219217.2 | 50 |
| LAP3 protein                                                | IPI00419237.2 | 7  |
| LTA4H protein                                               | IPI00219077.3 | 8  |
| Lamin-B1                                                    | IPI00217975.3 | 8  |
| Lamina-associated polypeptide 2 isoform alpha               | IPI00216230.2 | 6  |
| Leucyl-tRNA synthetase, cytoplasmic                         | IPI00103994.4 | 5  |
| Lupus La protein                                            | IPI00009032.1 | 10 |
| Lysyl-tRNA synthetase                                       | IPI00014238.2 | 6  |
| Macrophage migration inhibitory factor                      | IPI00293276.9 | 18 |
| Malate dehydrogenase, cytoplasmic                           | IPI00291005.7 | 21 |
| Malate dehydrogenase, mitochondrial precursor               | IPI00291006.1 | 51 |
| Matrin-3                                                    | IPI00017297.1 | 17 |
| Membrane associated progesterone receptor component 1       | IPI00220739.2 | 18 |
| Metastasis-associated protein MTA2                          | IPI00171798.1 | 6  |
| Methionyl-tRNA synthetase                                   | IPI00008240.2 | 7  |
| Microsomal glutathione S-transferase 1                      | IPI00021805.1 | 27 |
| Mitochondrial import receptor subunit TOM34                 | IPI00009946.4 | 14 |
| Mitotic checkpoint protein BUB3                             | IPI00013468.1 | 24 |
| Multifunctional protein ADE2                                | IPI00217223.1 | 41 |
| Myosin light chain 1, slow-twitch muscle A isoform          | IPI00027255.1 | 12 |
| Myosin-9                                                    | IPI00019502.2 | 37 |
| NADH-ubiquinone oxidoreductase 30 kDa subunit, mitochondria | IPI00025796.3 | 21 |
| NCL protein                                                 | IPI00183526.5 | 24 |
| NOL1/NOP2/Sun domain family 2 protein                       | IPI00306369.3 | 8  |
| NUP210 protein                                              | IPI00291755.4 | 4  |
| Neuroblast differentiation-associated protein AHNAK (Fragme | IPI00021812.1 | 11 |
| Neutral amino acid transporter B(0)                         | IPI00019472.4 | 10 |
| Niban-like protein                                          | IPI00456750.2 | 5  |
| Non-POU domain-containing octamer-binding protein           | IPI00304596.3 | 17 |
| Nuclear migration protein nudC                              | IPI00550746.4 | 21 |

|                                                             |               |    |
|-------------------------------------------------------------|---------------|----|
| Nuclear pore complex protein Nup153                         | IPI00292059.1 | 3  |
| Nuclear pore complex protein Nup214                         | IPI00183294.3 | 3  |
| Nuclease sensitive element-binding protein 1                | IPI00031812.1 | 22 |
| Nucleoporin 50 kDa                                          | IPI00026940.2 | 17 |
| Nucleoside diphosphate kinase A                             | IPI00012048.1 | 60 |
| Nucleoside diphosphate kinase B                             | IPI00026260.1 | 29 |
| OCIA domain containing 2 isoform 1                          | IPI00555902.1 | 21 |
| ORF protein                                                 | IPI00171903.1 | 27 |
| Ornithine aminotransferase, mitochondrial precursor         | IPI00022334.1 | 7  |
| Oxysterol-binding protein                                   | IPI00163644.2 | 6  |
| P63 protein                                                 | IPI00141318.1 | 18 |
| PREDICTED: KIAA0368 protein                                 | IPI00157790.4 | 5  |
| PREDICTED: KIAA1765 protein                                 | IPI00028196.4 | 4  |
| PREDICTED: heat shock 90kDa protein 1, alpha-like 3         | IPI00031523.2 | 22 |
| PREDICTED: similar to 40S ribosomal protein SA              | IPI00397774.1 | 18 |
| PREDICTED: similar to 60S ribosomal protein L27a            | IPI00398135.2 | 22 |
| PREDICTED: similar to ATP-dependent DNA helicase II, 70 kDa | IPI00412259.2 | 23 |
| PREDICTED: similar to bA486O22.3                            | IPI00025419.4 | 12 |
| PREDICTED: similar to ribosomal protein S3a; 40S ribosomal  | IPI00026138.3 | 17 |
| PRKAR2A protein                                             | IPI00063234.1 | 16 |
| Peptidyl-prolyl cis-trans isomerase A                       | IPI00419585.8 | 18 |
| Peptidyl-prolyl cis-trans isomerase B precursor             | IPI00646304.2 | 26 |
| Peptidyl-tRNA hydrolase 2, mitochondrial precursor          | IPI00032903.3 | 40 |
| Peroxiredoxin-1                                             | IPI00000874.1 | 51 |
| Peroxiredoxin-2                                             | IPI00027350.2 | 36 |
| Peroxiredoxin-4                                             | IPI00011937.1 | 50 |
| Peroxiredoxin-6                                             | IPI00220301.4 | 66 |
| Peroxisomal multifunctional enzyme type 2                   | IPI00019912.1 | 11 |
| Phosphatidylethanolamine-binding protein                    | IPI00219446.4 | 36 |
| Phosphoglycerate kinase 1                                   | IPI00169383.2 | 30 |
| Phosphoglycerate mutase 2                                   | IPI00218570.5 | 14 |
| Phosphoribosylformylglycinamide synthase                    | IPI00004534.3 | 11 |
| Plastin-1                                                   | IPI00032304.1 | 5  |
| Plastin-2                                                   | IPI00010471.3 | 52 |
| Poly [ADP-ribose] polymerase 1                              | IPI00449049.4 | 4  |
| Poly(rC)-binding protein 1                                  | IPI00016610.2 | 33 |
| Polymerase delta-interacting protein 2                      | IPI00165506.4 | 10 |
| Polyribonucleotide nucleotidyltransferase 1, mitochondrial  | IPI00291165.6 | 9  |
| Pre-mRNA-processing splicing factor 8                       | IPI00007928.4 | 6  |
| Probable ATP-dependent RNA helicase DDX48                   | IPI00009328.2 | 9  |
| Probable ATP-dependent RNA helicase DDX5                    | IPI00017617.1 | 12 |
| Probable pseudouridine synthase KIAA1897                    | IPI00044761.4 | 10 |
| Profilin-1                                                  | IPI00216691.4 | 65 |
| Programmed cell death 6-interacting protein                 | IPI00246058.4 | 8  |
| Prohibitin                                                  | IPI00017334.1 | 32 |
| Prohibitin-2                                                | IPI00027252.6 | 14 |
| Proliferating cell nuclear antigen                          | IPI00021700.3 | 55 |

|                                                             |               |    |
|-------------------------------------------------------------|---------------|----|
| Proliferation-associated protein 2G4                        | IPI00299000.3 | 37 |
| Proliferation-inducing gene 21                              | IPI00552496.1 | 55 |
| Prostaglandin E synthase 3                                  | IPI00015029.1 | 33 |
| Proteasome activator complex subunit 1                      | IPI00030154.1 | 29 |
| Proteasome activator complex subunit 2                      | IPI00384051.4 | 45 |
| Proteasome subunit alpha type 2                             | IPI00219622.2 | 23 |
| Proteasome subunit alpha type 5                             | IPI00291922.2 | 15 |
| Proteasome subunit alpha type 6                             | IPI00029623.1 | 22 |
| Proteasome subunit beta type (Fragment)                     | IPI00375704.1 | 34 |
| Proteasome subunit beta type 1                              | IPI00025019.3 | 16 |
| Proteasome subunit beta type 2                              | IPI00028006.1 | 12 |
| Proteasome subunit beta type 3                              | IPI00028004.2 | 23 |
| Protein C12orf5                                             | IPI00006907.1 | 22 |
| Protein DEK                                                 | IPI00020021.3 | 9  |
| Protein FAM49B                                              | IPI00303318.2 | 19 |
| Protein disulfide-isomerase A3 precursor                    | IPI00025252.1 | 31 |
| Protein disulfide-isomerase A4 precursor                    | IPI00009904.1 | 20 |
| Protein disulfide-isomerase precursor                       | IPI00010796.1 | 18 |
| Protein phosphatase 2C isoform gamma                        | IPI00006167.1 | 19 |
| Protein transport protein Sec24C                            | IPI00024661.4 | 5  |
| Protein-L-isoaspartate (D-aspartate) O-methyltransferase    | IPI00024989.7 | 35 |
| Purine nucleoside phosphorylase                             | IPI00017672.3 | 22 |
| Puromycin-sensitive aminopeptidase                          | IPI00026216.4 | 4  |
| Putative eukaryotic translation initiation factor 3 subunit | IPI00024425.2 | 7  |
| Putative sulfhydryl oxidase precursor                       | IPI00376394.1 | 6  |
| RAB1A, member RAS oncogene family                           | IPI00005719.1 | 36 |
| Rab GDP dissociation inhibitor alpha                        | IPI00010154.3 | 13 |
| Rab GDP dissociation inhibitor beta                         | IPI00031461.1 | 21 |
| Ras GTPase-activating-like protein IQGAP1                   | IPI00009342.1 | 11 |
| Ras-related protein Rab-14                                  | IPI00291928.6 | 33 |
| Ras-related protein Rab-2A                                  | IPI00031169.1 | 26 |
| Ras-related protein Rab-7                                   | IPI00016342.1 | 37 |
| Ras-related protein Rap-1b precursor                        | IPI00015148.3 | 18 |
| RcTPI1 (Fragment)                                           | IPI00383071.1 | 32 |
| Ribonuclease inhibitor                                      | IPI00550069.2 | 14 |
| Ribonucleases P/MRP protein subunit POP1                    | IPI00293331.3 | 5  |
| Ribonucleoside-diphosphate reductase large subunit          | IPI00013871.1 | 18 |
| RuvB-like 1                                                 | IPI00021187.3 | 15 |
| RuvB-like 2                                                 | IPI00009104.6 | 8  |
| S-adenosylmethionine synthetase isoform type-2              | IPI00010157.1 | 14 |
| S-methyl-5-thioadenosine phosphorylase                      | IPI00011876.1 | 29 |
| S100 calcium-binding protein A2                             | IPI00019869.2 | 45 |
| SF3B3 protein                                               | IPI00179138.2 | 11 |
| SMARCA4 isoform 2                                           | IPI00029822.3 | 3  |
| Sepiapterin reductase                                       | IPI00017469.1 | 27 |
| Serine hydroxymethyltransferase, mitochondrial precursor    | IPI00002520.1 | 18 |
| Serine-threonine kinase receptor-associated protein         | IPI00294536.1 | 17 |

|                                                             |               |    |
|-------------------------------------------------------------|---------------|----|
| Serine/threonine-protein phosphatase 2A 55 kDa regulatory s | IPI00332511.5 | 10 |
| Serine/threonine-protein phosphatase 2A catalytic subunit a | IPI00008380.1 | 13 |
| Signal recognition particle receptor beta subunit           | IPI00295098.3 | 33 |
| Similar to Calcium-dependent protease, small subunit        | IPI00025084.2 | 12 |
| Similar to Clathrin heavy chain                             | IPI00024067.2 | 16 |
| Similar to Eukaryotic translation initiation factor 4GI     | IPI00220365.3 | 6  |
| Similar to Ras-related protein Rab-5C                       | IPI00016339.3 | 34 |
| Similar to heterogeneous nuclear ribonucleoprotein A1 isofo | IPI00042578.5 | 21 |
| Small glutamine-rich tetratricopeptide repeat-containing pr | IPI00013949.1 | 28 |
| Small nuclear ribonucleoprotein E                           | IPI00029266.1 | 38 |
| Small nuclear ribonucleoprotein Sm D2                       | IPI00017963.1 | 41 |
| Sodium/potassium-transporting ATPase alpha-2 chain precurso | IPI00003021.1 | 6  |
| Sorbitol dehydrogenase                                      | IPI00216057.4 | 17 |
| Splice Isoform 1 of 26S proteasome non-ATPase regulatory su | IPI00299608.3 | 7  |
| Splice Isoform 1 of 40S ribosomal protein S24               | IPI00029750.1 | 20 |
| Splice Isoform 1 of ATP-binding cassette sub-family B membe | IPI00306748.1 | 6  |
| Splice Isoform 1 of Calcyclin-binding protein               | IPI00395627.3 | 55 |
| Splice Isoform 1 of Caldesmon                               | IPI00014516.1 | 6  |
| Splice Isoform 1 of Chromodomain helicase-DNA-binding prote | IPI00000846.1 | 2  |
| Splice Isoform 1 of Clathrin heavy chain 2                  | IPI00022881.1 | 5  |
| Splice Isoform 1 of Cleavage and polyadenylation specificit | IPI00012998.2 | 9  |
| Splice Isoform 1 of Cullin-associated NEDD8-dissociated pro | IPI00100160.3 | 15 |
| Splice Isoform 1 of Cytosolic acyl coenzyme A thioester hyd | IPI00010415.2 | 16 |
| Splice Isoform 1 of DNA-dependent protein kinase catalytic  | IPI00296337.2 | 10 |
| Splice Isoform 1 of Dual specificity mitogen-activated prot | IPI00218857.1 | 10 |
| Splice Isoform 1 of Elongation factor Ts, mitochondrial pre | IPI00021016.3 | 14 |
| Splice Isoform 1 of F-actin capping protein beta subunit    | IPI00026185.5 | 21 |
| Splice Isoform 1 of Far upstream element-binding protein 3  | IPI00377261.1 | 14 |
| Splice Isoform 1 of Filamin-B                               | IPI00289334.1 | 11 |
| Splice Isoform 1 of Gamma-interferon-inducible protein Ifi- | IPI00003443.2 | 5  |
| Splice Isoform 1 of General transcription factor II-I       | IPI00054042.1 | 8  |
| Splice Isoform 1 of Glucosamine--fructose-6-phosphate amino | IPI00217952.6 | 9  |
| Splice Isoform 1 of Glycerol-3-phosphate dehydrogenase, mit | IPI00017895.2 | 10 |
| Splice Isoform 1 of Heat shock cognate 71 kDa protein       | IPI00003865.1 | 54 |
| Splice Isoform 1 of Heterogeneous nuclear ribonucleoprotein | IPI00018140.2 | 17 |
| Splice Isoform 1 of Heterogeneous nuclear ribonucleoprotein | IPI00216049.1 | 40 |
| Splice Isoform 1 of Hexokinase-1                            | IPI00018246.4 | 4  |
| Splice Isoform 1 of Host cell factor                        | IPI00019848.1 | 2  |
| Splice Isoform 1 of Importin-4                              | IPI00156374.4 | 8  |
| Splice Isoform 1 of Importin-alpha re-exporter              | IPI00022744.5 | 11 |
| Splice Isoform 1 of Inorganic pyrophosphatase 2, mitochondr | IPI00301109.3 | 15 |
| Splice Isoform 1 of Isocitrate dehydrogenase [NAD] subunit  | IPI00030702.1 | 16 |

|                                                             |               |    |
|-------------------------------------------------------------|---------------|----|
| Splice Isoform 1 of Kinectin                                | IPI00328753.1 | 7  |
| Splice Isoform 1 of La-related protein 1                    | IPI00185919.3 | 4  |
| Splice Isoform 1 of Microtubule-associated protein 4        | IPI00396171.3 | 4  |
| Splice Isoform 1 of Minor histocompatibility antigen H13    | IPI00152441.3 | 16 |
| Splice Isoform 1 of Mitochondrial inner membrane protein    | IPI00009960.6 | 27 |
| Splice Isoform 1 of Nuclear autoantigenic sperm protein     | IPI00179953.2 | 24 |
| Splice Isoform 1 of Nucleolar RNA helicase 2                | IPI00015953.3 | 9  |
| Splice Isoform 1 of Plectin 1                               | IPI00014898.1 | 1  |
| Splice Isoform 1 of Polyadenylate-binding protein 1         | IPI00008524.1 | 29 |
| Splice Isoform 1 of Polypyrimidine tract-binding protein 1  | IPI00179964.5 | 31 |
| Splice Isoform 1 of Probable ATP-dependent RNA helicase DDX | IPI00023785.5 | 10 |
| Splice Isoform 1 of Probable mitochondrial import receptor  | IPI00014053.3 | 19 |
| Splice Isoform 1 of Programmed cell death protein 8, mitoch | IPI00000690.1 | 6  |
| Splice Isoform 1 of Proteasome activator complex subunit 3  | IPI00030243.1 | 32 |
| Splice Isoform 1 of Proteasome subunit alpha type 7         | IPI00024175.3 | 25 |
| Splice Isoform 1 of Protein KIAA1967                        | IPI00182757.9 | 16 |
| Splice Isoform 1 of Protein arginine N-methyltransferase 1  | IPI00018522.3 | 30 |
| Splice Isoform 1 of Pyridoxal kinase                        | IPI00013004.1 | 17 |
| Splice Isoform 1 of Ran-binding protein 3                   | IPI00026337.1 | 4  |
| Splice Isoform 1 of Reticulon-4                             | IPI00021766.3 | 8  |
| Splice Isoform 1 of Spectrin alpha chain, brain             | IPI00413728.2 | 5  |
| Splice Isoform 1 of Structural maintenance of chromosome 2- | IPI00007927.3 | 6  |
| Splice Isoform 1 of Surfeit locus protein 4                 | IPI00005737.1 | 18 |
| Splice Isoform 1 of Transcription intermediary factor 1-bet | IPI00438229.1 | 20 |
| Splice Isoform 1 of Ubiquitin ligase protein BRE1B          | IPI00162563.5 | 4  |
| Splice Isoform 1 of Uridine phosphorylase 1                 | IPI00004406.1 | 26 |
| Splice Isoform 1 of Voltage-dependent anion-selective chann | IPI00024145.1 | 37 |
| Splice Isoform 1 of Zinc finger protein 207                 | IPI00013457.1 | 7  |
| Splice Isoform 2 of Far upstream element-binding protein 1  | IPI00163782.2 | 7  |
| Splice Isoform 2 of Far upstream element-binding protein 3  | IPI00063245.1 | 26 |
| Splice Isoform 2 of HECT, UBA and WWE domain-containing pro | IPI00445401.2 | 2  |
| Splice Isoform 2 of Methylcrotonoyl-CoA carboxylase beta ch | IPI00294140.4 | 7  |
| Splice Isoform 2 of Microtubule-associated protein 4        | IPI00220113.1 | 7  |
| Splice Isoform 2 of NMDA receptor-regulated protein 1       | IPI00032158.2 | 9  |
| Splice Isoform 2 of Nucleophosmin                           | IPI00220740.1 | 42 |
| Splice Isoform 2 of SWI/SNF-related matrix-associated actin | IPI00150057.6 | 8  |
| Splice Isoform 2 of Signal recognition particle 68 kDa prot | IPI00102936.3 | 7  |
| Splice Isoform 2 of Structural maintenance of chromosomes 4 | IPI00328298.6 | 5  |
| Splice Isoform 2 of Transportin 3                           | IPI00395694.1 | 8  |
| Splice Isoform 2 of Triosephosphate isomerase               | IPI00451401.2 | 27 |
| Splice Isoform 3 of Drebrin-like protein                    | IPI00101968.3 | 17 |
| Splice Isoform 3 of Ribosome-binding protein 1              | IPI00215743.2 | 11 |
| Splice Isoform 4 of Apoptosis inhibitor 5                   | IPI00006684.2 | 8  |
| Splice Isoform 5 of Dynamin-1-like protein                  | IPI00037283.2 | 12 |



|                                                             |               |    |
|-------------------------------------------------------------|---------------|----|
| Splice Isoform 5 of Interleukin enhancer-binding factor 3   | IPI00219330.2 | 6  |
| Splice Isoform A of Lamin-A/C                               | IPI00021405.3 | 12 |
| Splice Isoform A of Phosphate carrier protein, mitochondria | IPI00022202.3 | 20 |
| Splice Isoform AGX2 of UDP-N-acetylhexosamine pyrophosphory | IPI00000684.4 | 17 |
| Splice Isoform B of Arsenite-resistance protein 2           | IPI00220038.1 | 5  |
| Splice Isoform Beta of Heat-shock protein 105 kDa           | IPI00218993.1 | 12 |
| Splice Isoform Beta-1C of Integrin beta-1 precursor         | IPI00217561.1 | 13 |
| Splice Isoform DFF45 of DNA fragmentation factor alpha subu | IPI00010882.3 | 14 |
| Splice Isoform DUT-M of Deoxyuridine 5'-triphosphate nucleo | IPI00013679.1 | 34 |
| Splice Isoform GTBP-alt of DNA mismatch repair protein MSH6 | IPI00106847.3 | 4  |
| Splice Isoform Gamma-1 of Serine/threonine-protein phosphat | IPI00005705.1 | 25 |
| Splice Isoform Long of Delta 1-pyrroline-5-carboxylate synt | IPI00008982.1 | 22 |
| Splice Isoform Long of Double-stranded RNA-binding protein  | IPI00000001.1 | 5  |
| Splice Isoform Long of Heterogenous nuclear ribonucleoprote | IPI00025054.1 | 19 |
| Splice Isoform Long of Long-chain-fatty-acid--CoA ligase 4  | IPI00029737.1 | 6  |
| Splice Isoform Long of Sodium/potassium-transporting ATPase | IPI00006482.1 | 9  |
| Splice Isoform Long of Spectrin beta chain, brain 1         | IPI00005614.5 | 3  |
| Splice Isoform Long of Splicing factor, proline- and glutam | IPI00010740.1 | 8  |
| Splice Isoform Long of Trifunctional purine biosynthetic pr | IPI00025273.1 | 14 |
| Splice Isoform Long of Trifunctional purine biosynthetic pr | IPI00025273.1 | 14 |
| Splice Isoform Long of Ubiquitin carboxyl-terminal hydrolas | IPI00024664.1 | 11 |
| Splice Isoform SERCA1B of Sarcoplasmic/endoplasmic reticulu | IPI00024804.3 | 5  |
| Splice Isoform SERCA2A of Sarcoplasmic/endoplasmic reticulu | IPI00177817.4 | 5  |
| Spliceosome RNA helicase BAT1                               | IPI00328343.7 | 14 |
| Splicing coactivator subunit SRm300                         | IPI00099730.3 | 2  |
| Splicing factor 3B subunit 1                                | IPI00026089.3 | 6  |
| Splicing factor 3B subunit 3                                | IPI00300371.3 | 16 |
| Src substrate cortactin                                     | IPI00029601.3 | 20 |
| Staphylococcal nuclease domain-containing protein 1         | IPI00140420.4 | 32 |
| Stomatin-like protein 2                                     | IPI00334190.4 | 30 |
| Stress-70 protein, mitochondrial precursor                  | IPI00007765.5 | 42 |
| Stress-induced-phosphoprotein 1                             | IPI00013894.1 | 20 |
| Succinyl-CoA:3-ketoacid-coenzyme A transferase 1, mitochond | IPI00026516.1 | 12 |
| T-complex protein 1 subunit alpha                           | IPI00290566.1 | 31 |
| T-complex protein 1 subunit beta                            | IPI00297779.6 | 57 |
| T-complex protein 1 subunit delta                           | IPI00302927.5 | 14 |
| T-complex protein 1 subunit epsilon                         | IPI00010720.1 | 21 |
| T-complex protein 1 subunit eta                             | IPI00018465.1 | 27 |
| T-complex protein 1 subunit theta                           | IPI00302925.3 | 39 |
| T-complex protein 1 subunit zeta                            | IPI00027626.2 | 26 |
| TALDO1 protein                                              | IPI00550488.2 | 14 |

|                                                             |               |    |
|-------------------------------------------------------------|---------------|----|
| TUBA6 protein                                               | IPI00166768.2 | 26 |
| Talin-1                                                     | IPI00298994.4 | 6  |
| Thioredoxin                                                 | IPI00216298.5 | 58 |
| Thioredoxin-dependent peroxide reductase, mitochondrial pre | IPI00024919.3 | 25 |
| Thioredoxin-like protein 1                                  | IPI00305692.4 | 16 |
| Thioredoxin-like protein 2                                  | IPI00008552.6 | 11 |
| Threonyl-tRNA synthetase, cytoplasmic                       | IPI00329633.5 | 12 |
| Transcription elongation factor B polypeptide 2             | IPI00026670.3 | 31 |
| Transferrin receptor protein 1                              | IPI00022462.1 | 23 |
| Transgelin-2                                                | IPI00550363.2 | 38 |
| Transitional endoplasmic reticulum ATPase                   | IPI00022774.2 | 29 |
| Transketolase                                               | IPI00021716.1 | 15 |
| Translin                                                    | IPI00018768.1 | 17 |
| Translocated promoter region                                | IPI00022970.3 | 5  |
| Translocon-associated protein delta subunit precursor       | IPI00019385.1 | 25 |
| Treacher Collins-Franceschetti syndrome 1 isoform a         | IPI00165041.3 | 2  |
| Trifunctional enzyme alpha subunit, mitochondrial precursor | IPI00031522.2 | 25 |
| Tropomyosin 4                                               | IPI00010779.3 | 27 |
| Tubulin alpha-1 chain                                       | IPI00007750.1 | 48 |
| Tubulin alpha-1 chain                                       | IPI00007750.1 | 48 |
| Tubulin beta-1 chain                                        | IPI00006510.1 | 4  |
| Tubulin beta-2 chain                                        | IPI00011654.2 | 23 |
| Tubulin beta-2C chain                                       | IPI00007752.1 | 65 |
| Tubulin beta-3 chain                                        | IPI00013683.2 | 11 |
| Tubulin beta-4q chain                                       | IPI00018511.1 | 7  |
| Tubulin--tyrosine ligase-like protein 12                    | IPI00029048.2 | 5  |
| Tumor protein, translationally-controlled 1                 | IPI00009943.2 | 14 |
| Tyrosine-protein phosphatase non-receptor type 1            | IPI00297261.3 | 8  |
| Tyrosyl-tRNA synthetase, cytoplasmic                        | IPI00007074.4 | 7  |
| U5 small nuclear ribonucleoprotein 200 kDa helicase         | IPI00420014.2 | 7  |
| Ubiquinol-cytochrome-c reductase complex core protein I, mi | IPI00013847.3 | 9  |
| Ubiquitin and ribosomal protein S27a                        | IPI00179330.5 | 24 |
| Ubiquitin carboxyl-terminal hydrolase 7                     | IPI00003965.4 | 3  |
| Ubiquitin carboxyl-terminal hydrolase isozyme L3            | IPI00011250.3 | 24 |
| Ubiquitin-activating enzyme E1                              | IPI00026119.6 | 23 |
| Ubiquitin-conjugating enzyme E2 L3                          | IPI00021347.1 | 30 |
| VAMP-associated protein B/C                                 | IPI00006211.3 | 23 |
| Vacuolar ATP synthase catalytic subunit A, ubiquitous isofo | IPI00007682.2 | 16 |
| Valyl-tRNA synthetase                                       | IPI00000873.3 | 5  |
| Vasodilator-stimulated phosphoprotein                       | IPI00301058.4 | 17 |
| Vigilin                                                     | IPI00022228.1 | 6  |
| WUGSC:H_RG054D04.1 protein                                  | IPI00011457.1 | 14 |
| Zyxin                                                       | IPI00020513.2 | 23 |
| chaperonin containing TCP1, subunit 3 isoform b             | IPI00290770.3 | 21 |
| cytochrome b5 outer mitochondrial membrane precursor        | IPI00303954.3 | 49 |
| dextrin isoform b                                           | IPI00031045.3 | 30 |
| eIF-5A2 protein                                             | IPI00006935.1 | 20 |

|                                                             |               |    |
|-------------------------------------------------------------|---------------|----|
| eukaryotic translation initiation factor 4 gamma, 1 isoform | IPI00384463.3 | 4  |
| fuse-binding protein-interacting repressor isoform a        | IPI00069750.1 | 12 |
| heterogeneous nuclear ribonucleoprotein D-like              | IPI00011274.1 | 8  |
| heterogeneous nuclear ribonucleoprotein H1                  | IPI00013881.5 | 19 |
| heterogeneous nuclear ribonucleoprotein L isoform a         | IPI00027834.3 | 14 |
| homolog of yeast mRNA transport regulator 3                 | IPI00073602.1 | 28 |
| hypothetical protein FLJ12443                               | IPI00171626.3 | 7  |
| hypothetical protein LOC345651                              | IPI00003269.1 | 18 |
| hypothetical protein LOC55720                               | IPI00292894.3 | 5  |
| isopentenyl-diphosphate delta isomerase                     | IPI00220014.2 | 16 |
| lactate dehydrogenase A                                     | IPI00217966.6 | 42 |
| poly(rC)-binding protein 2 isoform b                        | IPI00012066.1 | 36 |
| pyruvate kinase 3 isoform 2                                 | IPI00220644.6 | 50 |
| smooth muscle and non-muscle myosin alkali light chain isof | IPI00066374.1 | 41 |
| sorting nexin 1 isoform c                                   | IPI00183274.2 | 7  |
| suppressor of G2 allele of SKP1                             | IPI00009149.1 | 11 |
| thymopoietin isoform beta                                   | IPI00030131.2 | 27 |
| tropomyosin 1 alpha chain isoform 2                         | IPI00000230.5 | 9  |
| twinfilin isoform 1                                         | IPI00183508.2 | 10 |
| vinculin isoform VCL                                        | IPI00291175.5 | 8  |

Table S3. Proteins identified with Az-HNE treatment of RKO cells (2 mg of cellular lysate protein). Displayed from left to right are the protein names, the Accession number, and percent coverage for all of the proteins in the DMSO control, 5, 10, and 50  $\mu$ M Az-HNE treated cells.

| DMSO Control                                          |               |            |
|-------------------------------------------------------|---------------|------------|
| Protein                                               | Accession     | % Coverage |
| 42 kDa protein                                        | IPI00164375.6 | 9          |
| 60 kDa heat shock protein, mitochondrial precursor    | IPI00472102.2 | 5          |
| 78 kDa glucose-regulated protein precursor            | IPI00003362.1 | 10         |
| ALB protein                                           | IPI00022434.2 | 5          |
| Actin, aortic smooth muscle                           | IPI00008603.1 | 6          |
| Cytokeratin type II                                   | IPI00005859.1 | 4          |
| Endoplasmic precursor                                 | IPI00027230.3 | 5          |
| Heat shock protein HSP 90-alpha 2                     | IPI00382470.2 | 3          |
| Hypothetical protein DKFZp761K0511                    | IPI00334775.5 | 7          |
| Junction plakoglobin                                  | IPI00554711.1 | 5          |
| Keratin, type I cytoskeletal 10                       | IPI00009865.1 | 22         |
| Keratin, type I cytoskeletal 14                       | IPI00384444.4 | 14         |
| Keratin, type I cytoskeletal 16                       | IPI00217963.2 | 5          |
| Keratin, type I cytoskeletal 9                        | IPI00019359.3 | 35         |
| Keratin, type II cytoskeletal 1                       | IPI00220327.2 | 36         |
| Keratin, type II cytoskeletal 2 epidermal             | IPI00021304.1 | 27         |
| Keratin, type II cytoskeletal 5                       | IPI00009867.2 | 13         |
| PREDICTED: heat shock 90kDa protein 1, alpha-like 3   | IPI00031523.2 | 8          |
| Splice Isoform 1 of Heat shock cognate 71 kDa protein | IPI00003865.1 | 7          |
| Splice Isoform 1 of Keratin, type I cytoskeletal 13   | IPI00009866.6 | 5          |
| Stress-70 protein, mitochondrial precursor            | IPI00007765.5 | 3          |
| 5 $\mu$ M Az-HNE                                      |               |            |
| 10 kDa heat shock protein, mitochondrial              | IPI00220362.4 | 24         |
| 12 kDa protein                                        | IPI00176698.1 | 21         |
| 14-3-3 protein beta/alpha                             | IPI00216318.4 | 12         |
| 14-3-3 protein epsilon                                | IPI00000816.1 | 18         |
| 14-3-3 protein gamma                                  | IPI00220642.6 | 10         |
| 14-3-3 protein theta                                  | IPI00018146.1 | 23         |
| 14-3-3 protein zeta/delta                             | IPI00021263.3 | 18         |
| 26S protease regulatory subunit 7                     | IPI00021435.2 | 6          |
| 26S proteasome non-ATPase regulatory subunit 2        | IPI00012268.2 | 2          |
| 29 kDa protein                                        | IPI00015139.3 | 4          |
| 3-ketoacyl-CoA thiolase, mitochondrial                | IPI00001539.8 | 8          |
| 39 kDa protein                                        | IPI00334627.2 | 9          |
| 40S ribosomal protein S16                             | IPI00221092.7 | 15         |

|                                                             |                |    |
|-------------------------------------------------------------|----------------|----|
| 40S ribosomal protein S3                                    | IPI00011253.2  | 20 |
| 40S ribosomal protein S4, X isoform                         | IPI00217030.9  | 8  |
| 40S ribosomal protein S8                                    | IPI00216587.8  | 14 |
| 42 kDa protein                                              | IPI00164375.6  | 11 |
| 50 kDa protein                                              | IPI00246022.3  | 8  |
| 53 kDa protein                                              | IPI00172579.3  | 4  |
| 6-phosphogluconate dehydrogenase, decarboxylating           | IPI00219525.9  | 12 |
| 60 kDa heat shock protein, mitochondrial precursor          | IPI00472102.2  | 23 |
| 60S acidic ribosomal protein P0                             | IPI00008530.1  | 39 |
| 60S ribosomal protein L18                                   | IPI00215719.5  | 26 |
| 60S ribosomal protein L19                                   | IPI00025329.1  | 13 |
| 78 kDa glucose-regulated protein precursor                  | IPI00003362.1  | 27 |
| 93 kDa protein                                              | IPI00177366.2  | 3  |
| ADP/ATP translocase 2                                       | IPI00007188.4  | 12 |
| ATP synthase O subunit, mitochondrial precursor             | IPI00007611.1  | 11 |
| ATP synthase alpha chain, mitochondrial precursor           | IPI00440493.2  | 17 |
| ATP-dependent RNA helicase DDX1                             | IPI00293655.3  | 3  |
| Actin, aortic smooth muscle                                 | IPI00008603.1  | 13 |
| Actin, cytoplasmic 1                                        | IPI00021439.1  | 21 |
| Adenosylhomocysteinase                                      | IPI00012007.5  | 8  |
| Alpha-actinin-1                                             | IPI00013508.4  | 7  |
| Alpha-actinin-4                                             | IPI00013808.1  | 7  |
| Alpha-enolase                                               | IPI00465248.4  | 15 |
| Alpha-enolase, lung specific                                | IPI00013769.1  | 9  |
| Annexin A5                                                  | IPI00329801.11 | 10 |
| Arginyl-tRNA synthetase                                     | IPI00004860.2  | 7  |
| Aspartate aminotransferase, mitochondrial precursor         | IPI00018206.3  | 9  |
| C-1-tetrahydrofolate synthase, cytoplasmic                  | IPI00218342.9  | 4  |
| CDNA FLJ45525 fis, clone BRTHA2026311, highly similar to Pr | IPI00299571.4  | 12 |
| Calreticulin precursor                                      | IPI00020599.1  | 6  |
| Carbonyl reductase [NADPH] 1                                | IPI00295386.6  | 8  |
| Chloride intracellular channel protein 1                    | IPI00010896.2  | 13 |
| Citrate synthase, mitochondrial precursor                   | IPI00025366.4  | 9  |
| Cofilin, non-muscle isoform                                 | IPI00012011.4  | 20 |
| Cytokeratin type II                                         | IPI00005859.1  | 8  |
| D-3-phosphoglycerate dehydrogenase                          | IPI00011200.4  | 7  |
| DNA replication licensing factor MCM2                       | IPI00184330.5  | 4  |
| DNA replication licensing factor MCM4                       | IPI00018349.5  | 2  |
| Developmentally-regulated GTP-binding protein 1             | IPI00031836.3  | 6  |
| Dihydrolipoyl dehydrogenase, mitochondrial precursor        | IPI00015911.1  | 5  |
| EEF1A1 protein                                              | IPI00025447.6  | 8  |
| Elongation factor 1-alpha 2                                 | IPI00014424.1  | 12 |
| Elongation factor 1-delta                                   | IPI00023048.3  | 13 |
| Elongation factor 1-gamma                                   | IPI00000875.5  | 5  |
| Elongation factor 2                                         | IPI00186290.5  | 12 |
| Elongation factor Tu, mitochondrial precursor               | IPI00027107.4  | 14 |
| Endoplasmin precursor                                       | IPI00027230.3  | 8  |

|                                                             |                |    |
|-------------------------------------------------------------|----------------|----|
| Eukaryotic initiation factor 4A-I                           | IPI00025491.1  | 9  |
| Fatty acid synthase                                         | IPI00026781.2  | 2  |
| Filamin A, alpha                                            | IPI00302592.2  | 5  |
| Fructose-bisphosphate aldolase A                            | IPI00465439.4  | 29 |
| Fumarate hydratase, mitochondrial precursor                 | IPI00296053.3  | 9  |
| G22P1 protein                                               | IPI00465430.4  | 6  |
| GPI-anchored protein p137                                   | IPI00030910.1  | 5  |
| GTP-binding nuclear protein RAN                             | IPI00012507.3  | 13 |
| Galectin-1                                                  | IPI00219219.2  | 18 |
| Glucose-6-phosphate isomerase                               | IPI00027497.4  | 12 |
| Glutathione S-transferase P                                 | IPI00219757.12 | 18 |
| Glutathione synthetase                                      | IPI00010706.1  | 5  |
| Glyceraldehyde-3-phosphate dehydrogenase                    | IPI00219018.6  | 23 |
| Guanine nucleotide-binding protein G(I)/G(S)/G(T) beta subu | IPI00003348.2  | 6  |
| HNRPF protein                                               | IPI00003881.5  | 12 |
| Heat shock 70 kDa protein 1                                 | IPI00304925.3  | 7  |
| Heat shock 70 kDa protein 1L                                | IPI00301277.1  | 4  |
| Heat shock 70 kDa protein 4                                 | IPI00002966.1  | 9  |
| Heat shock 70 kDa protein 7 (Fragment)                      | IPI00011134.1  | 11 |
| Heat shock protein 75 kDa, mitochondrial precursor          | IPI00030275.5  | 6  |
| Heat shock protein HSP 90-alpha 2                           | IPI00382470.2  | 4  |
| Hsc70-interacting protein                                   | IPI00032826.1  | 7  |
| Hypothetical protein DKFZp761K0511                          | IPI00334775.5  | 12 |
| Keratin, type I cytoskeletal 10                             | IPI00009865.1  | 27 |
| Keratin, type I cytoskeletal 14                             | IPI00384444.4  | 18 |
| Keratin, type I cytoskeletal 16                             | IPI00217963.2  | 14 |
| Keratin, type I cytoskeletal 9                              | IPI00019359.3  | 36 |
| Keratin, type II cytoskeletal 1                             | IPI00220327.2  | 44 |
| Keratin, type II cytoskeletal 2 epidermal                   | IPI00021304.1  | 26 |
| Keratin, type II cytoskeletal 5                             | IPI00009867.2  | 13 |
| Kinesin heavy chain                                         | IPI00012837.1  | 4  |
| L-lactate dehydrogenase B chain                             | IPI00219217.2  | 18 |
| Lon protease homolog, mitochondrial precursor               | IPI00005158.1  | 2  |
| Macrophage migration inhibitory factor                      | IPI00293276.9  | 10 |
| Malate dehydrogenase, cytoplasmic                           | IPI00291005.7  | 13 |
| Multifunctional protein ADE2                                | IPI00217223.1  | 4  |
| Nucleoside diphosphate kinase A                             | IPI00012048.1  | 13 |
| ORF protein                                                 | IPI00171903.1  | 7  |
| PREDICTED: KIAA1765 protein                                 | IPI00028196.4  | 2  |
| PREDICTED: heat shock 90kDa protein 1, alpha-like 3         | IPI00031523.2  | 16 |
| PREDICTED: similar to 40S ribosomal protein SA              | IPI00397774.1  | 10 |
| PREDICTED: similar to Ran-specific GTPase-activating protei | IPI00399212.1  | 11 |
| Peroxiredoxin-1                                             | IPI00000874.1  | 11 |
| Phosphoglycerate kinase 1                                   | IPI00169383.2  | 23 |
| Phosphoribosylformylglycinamide synthase                    | IPI00004534.3  | 2  |
| Plastin-2                                                   | IPI00010471.3  | 6  |
| Probable ATP-dependent RNA helicase DDX5                    | IPI00017617.1  | 6  |

|                                                             |               |    |
|-------------------------------------------------------------|---------------|----|
| Profilin-1                                                  | IPI00216691.4 | 47 |
| Prohibitin                                                  | IPI00017334.1 | 8  |
| Proliferating cell nuclear antigen                          | IPI00021700.3 | 17 |
| Proliferation-inducing gene 21                              | IPI00552496.1 | 23 |
| Proteasome subunit alpha type 6                             | IPI00029623.1 | 9  |
| Proteasome subunit beta type (Fragment)                     | IPI00375704.1 | 9  |
| Protein disulfide-isomerase A3 precursor                    | IPI00025252.1 | 23 |
| Protein disulfide-isomerase A4 precursor                    | IPI00009904.1 | 6  |
| Protein disulfide-isomerase precursor                       | IPI00010796.1 | 6  |
| Purine nucleoside phosphorylase                             | IPI00017672.3 | 13 |
| Rab GDP dissociation inhibitor beta                         | IPI00031461.1 | 5  |
| RcTPI1 (Fragment)                                           | IPI00383071.1 | 36 |
| S-adenosylmethionine synthetase isoform type-2              | IPI00010157.1 | 10 |
| Serine hydroxymethyltransferase, mitochondrial precursor    | IPI00002520.1 | 15 |
| Serine-threonine kinase receptor-associated protein         | IPI00294536.1 | 14 |
| Signal recognition particle receptor beta subunit           | IPI00295098.3 | 12 |
| Similar to Clathrin heavy chain                             | IPI00024067.2 | 4  |
| Splice Isoform 1 of 60S ribosomal protein L11               | IPI00219150.5 | 13 |
| Splice Isoform 1 of Cullin-associated NEDD8-dissociated pro | IPI00100160.3 | 2  |
| Splice Isoform 1 of Heat shock cognate 71 kDa protein       | IPI00003865.1 | 35 |
| Splice Isoform 1 of Heterogeneous nuclear ribonucleoprotein | IPI00216049.1 | 18 |
| Splice Isoform 1 of Importin-alpha re-exporter              | IPI00022744.5 | 3  |
| Splice Isoform 1 of Isocitrate dehydrogenase [NAD] subunit  | IPI00030702.1 | 6  |
| Splice Isoform 1 of Keratin, type I cytoskeletal 13         | IPI00009866.6 | 5  |
| Splice Isoform 1 of Polyadenylate-binding protein 1         | IPI00008524.1 | 9  |
| Splice Isoform 1 of Proteasome subunit alpha type 7         | IPI00024175.3 | 12 |
| Splice Isoform 1 of Transcription intermediary factor 1-bet | IPI00438229.1 | 2  |
| Splice Isoform A of Phosphate carrier protein, mitochondria | IPI00022202.3 | 8  |
| Splice Isoform AGX2 of UDP-N-acetylhexosamine pyrophosphory | IPI00000684.4 | 7  |
| Splice Isoform Beta of Heat-shock protein 105 kDa           | IPI00218993.1 | 3  |
| Splice Isoform Long of Delta 1-pyrroline-5-carboxylate synt | IPI00008982.1 | 4  |
| Spliceosome RNA helicase BAT1                               | IPI00328343.7 | 6  |
| Staphylococcal nuclease domain-containing protein 1         | IPI00140420.4 | 5  |
| Stomatin-like protein 2                                     | IPI00334190.4 | 8  |
| Stress-70 protein, mitochondrial precursor                  | IPI00007765.5 | 23 |
| Stress-induced-phosphoprotein 1                             | IPI00013894.1 | 4  |
| T-complex protein 1 subunit alpha                           | IPI00290566.1 | 7  |
| T-complex protein 1 subunit beta                            | IPI00297779.6 | 13 |
| T-complex protein 1 subunit delta                           | IPI00302927.5 | 9  |
| T-complex protein 1 subunit eta                             | IPI00018465.1 | 9  |
| T-complex protein 1 subunit theta                           | IPI00302925.3 | 17 |
| T-complex protein 1 subunit zeta                            | IPI00027626.2 | 5  |
| TUBA6 protein                                               | IPI00166768.2 | 22 |
| Thioredoxin domain-containing protein 5 precursor           | IPI00171438.2 | 4  |
| Threonyl-tRNA synthetase, cytoplasmic                       | IPI00329633.5 | 3  |
| Transcription elongation factor B polypeptide 1             | IPI00300341.5 | 18 |
| Transferrin receptor protein 1                              | IPI00022462.1 | 10 |

|                                                             |               |            |
|-------------------------------------------------------------|---------------|------------|
| Transgelin-2                                                | IPI00550363.2 | 10         |
| Transitional endoplasmic reticulum ATPase                   | IPI00022774.2 | 5          |
| Transketolase                                               | IPI00021716.1 | 6          |
| Trifunctional enzyme alpha subunit, mitochondrial precursor | IPI00031522.2 | 3          |
| Tubulin alpha-1 chain                                       | IPI00007750.1 | 22         |
| Tubulin beta-1 chain                                        | IPI00006510.1 | 2          |
| Tubulin beta-2 chain                                        | IPI00011654.2 | 13         |
| Tubulin beta-2C chain                                       | IPI00007752.1 | 28         |
| Ubiquitin carboxyl-terminal hydrolase 14                    | IPI00219913.9 | 5          |
| Ubiquitin-activating enzyme E1                              | IPI00645078.1 | 3          |
| chaperonin containing TCP1, subunit 3 isoform b             | IPI00290770.3 | 12         |
| hypothetical protein LOC345651                              | IPI00003269.1 | 6          |
| lactate dehydrogenase A                                     | IPI00217966.6 | 14         |
| poly(rC)-binding protein 2 isoform b                        | IPI00012066.1 | 9          |
| pyruvate kinase 3 isoform 2                                 | IPI00220644.6 | 37         |
|                                                             |               | 0          |
| <b>10 <math>\mu</math>M Az-HNE</b>                          |               |            |
| Protein                                                     | Accession     | % Coverage |
| 10 kDa heat shock protein, mitochondrial                    | IPI00220362.4 | 24         |
| 14-3-3 protein zeta/delta                                   | IPI00021263.3 | 11         |
| 39 kDa protein                                              | IPI00334627.2 | 6          |
| 40S ribosomal protein S3                                    | IPI00011253.2 | 26         |
| 40S ribosomal protein S4, X isoform                         | IPI00217030.9 | 8          |
| 42 kDa protein                                              | IPI00164375.6 | 6          |
| 60 kDa heat shock protein, mitochondrial precursor          | IPI00472102.2 | 7          |
| 60S acidic ribosomal protein P0                             | IPI00008530.1 | 7          |
| 60S ribosomal protein L18                                   | IPI00215719.5 | 26         |
| 78 kDa glucose-regulated protein precursor                  | IPI00003362.1 | 15         |
| ATP synthase O subunit, mitochondrial precursor             | IPI00007611.1 | 16         |
| ATP synthase alpha chain, mitochondrial precursor           | IPI00440493.2 | 5          |
| Actin, aortic smooth muscle                                 | IPI00008603.1 | 9          |
| Actin, cytoplasmic 1                                        | IPI00021439.1 | 13         |
| Adenylate kinase isoenzyme 1                                | IPI00018342.5 | 12         |
| Alpha-actinin-1                                             | IPI00013508.4 | 3          |
| Alpha-actinin-4                                             | IPI00013808.1 | 5          |
| Alpha-enolase, lung specific                                | IPI00013769.1 | 7          |
| Aspartate aminotransferase, mitochondrial precursor         | IPI00018206.3 | 9          |
| Chloride intracellular channel protein 1                    | IPI00010896.2 | 10         |
| Cytochrome c                                                | IPI00465315.5 | 25         |
| Cytokeratin type II                                         | IPI00005859.1 | 4          |
| D-3-phosphoglycerate dehydrogenase                          | IPI00011200.4 | 9          |
| Elongation factor 1-alpha 2                                 | IPI00014424.1 | 5          |
| Elongation factor 2                                         | IPI00186290.5 | 4          |
| Endoplasmin precursor                                       | IPI00027230.3 | 6          |
| Endoplasmin precursor                                       | IPI00027230.3 | 6          |
| Far upstream element-binding protein 2                      | IPI00298363.2 | 5          |



|                                                              |               |    |
|--------------------------------------------------------------|---------------|----|
| Filamin A, alpha                                             | IPI00302592.2 | 3  |
| Fructose-bisphosphate aldolase A                             | IPI00465439.4 | 11 |
| GPI-anchored protein p137                                    | IPI00030910.1 | 4  |
| GTP-binding nuclear protein RAN                              | IPI00012507.3 | 13 |
| Glucose-6-phosphate isomerase                                | IPI00027497.4 | 5  |
| Glyceraldehyde-3-phosphate dehydrogenase                     | IPI00219018.6 | 14 |
| Heat shock 70 kDa protein 1                                  | IPI00304925.3 | 6  |
| Heat shock 70 kDa protein 4                                  | IPI00002966.1 | 5  |
| Heat shock protein 75 kDa, mitochondrial precursor           | IPI00030275.5 | 4  |
| Heat shock protein HSP 90-alpha 2                            | IPI00382470.2 | 3  |
| Hypothetical protein DKFZp761K0511                           | IPI00334775.5 | 5  |
| Keratin 24                                                   | IPI00004550.4 | 3  |
| Keratin, type I cytoskeletal 10                              | IPI00009865.1 | 22 |
| Keratin, type I cytoskeletal 14                              | IPI00384444.4 | 10 |
| Keratin, type I cytoskeletal 16                              | IPI00217963.2 | 7  |
| Keratin, type I cytoskeletal 9                               | IPI00019359.3 | 14 |
| Keratin, type II cytoskeletal 1                              | IPI00220327.2 | 31 |
| Keratin, type II cytoskeletal 2 epidermal                    | IPI00021304.1 | 27 |
| Keratin, type II cytoskeletal 5                              | IPI00009867.2 | 12 |
| L-lactate dehydrogenase B chain                              | IPI00219217.2 | 13 |
| Macrophage migration inhibitory factor                       | IPI00293276.9 | 18 |
| NCL protein                                                  | IPI00183526.5 | 5  |
| PREDICTED: KIAA1765 protein                                  | IPI00028196.4 | 2  |
| PREDICTED: heat shock 90kDa protein 1, alpha-like 3          | IPI00031523.2 | 6  |
| PREDICTED: similar to 40S ribosomal protein SA               | IPI00397774.1 | 10 |
| PREDICTED: similar to ribosomal protein L13; 60S ribosomal   | IPI00397611.1 | 10 |
| Peroxiredoxin-1                                              | IPI00000874.1 | 16 |
| Probable ATP-dependent RNA helicase DDX5                     | IPI00017617.1 | 3  |
| Profilin-1                                                   | IPI00216691.4 | 50 |
| Proliferation-inducing gene 21                               | IPI00552496.1 | 8  |
| Protein disulfide-isomerase A3 precursor                     | IPI00025252.1 | 8  |
| RcTPI1 (Fragment)                                            | IPI00383071.1 | 32 |
| Serine hydroxymethyltransferase, mitochondrial precursor     | IPI00002520.1 | 6  |
| Splice Isoform 1 of Heat shock cognate 71 kDa protein        | IPI00003865.1 | 21 |
| Splice Isoform 1 of Polyadenylate-binding protein 1          | IPI00008524.1 | 5  |
| Splice Isoform 1 of Transcription intermediary factor 1-beta | IPI00438229.1 | 2  |
| Stress-70 protein, mitochondrial precursor                   | IPI00007765.5 | 16 |
| T-complex protein 1 subunit alpha                            | IPI00290566.1 | 4  |
| T-complex protein 1 subunit theta                            | IPI00302925.3 | 5  |
| TUBA6 protein                                                | IPI00166768.2 | 17 |
| Tubulin beta-2 chain                                         | IPI00011654.2 | 6  |
| Tubulin beta-2C chain                                        | IPI00007752.1 | 16 |
| chaperonin containing TCP1, subunit 3 isoform b              | IPI00290770.3 | 4  |
| lactate dehydrogenase A                                      | IPI00217966.6 | 6  |
| poly(rC)-binding protein 2 isoform b                         | IPI00012066.1 | 12 |
| pyruvate kinase 3 isoform 2                                  | IPI00220644.6 | 10 |

| 50 $\mu$ M Az-HNE                                       |               |    |
|---------------------------------------------------------|---------------|----|
| 116 kDa U5 small nuclear ribonucleoprotein component    | IPI00003519.1 | 3  |
| 12 kDa protein                                          | IPI00373857.1 | 10 |
| 130 kDa leucine-rich protein                            | IPI00329745.4 | 13 |
| 14-3-3 protein epsilon                                  | IPI00000816.1 | 14 |
| 14-3-3 protein gamma                                    | IPI00220642.6 | 10 |
| 14-3-3 protein theta                                    | IPI00018146.1 | 13 |
| 14-3-3 protein zeta/delta                               | IPI00021263.3 | 18 |
| 2,4-dienoyl-CoA reductase, mitochondrial precursor      | IPI00003482.1 | 11 |
| 26S protease regulatory subunit 4                       | IPI00011126.6 | 23 |
| 26S protease regulatory subunit 6A                      | IPI00018398.4 | 20 |
| 26S protease regulatory subunit 7                       | IPI00021435.2 | 6  |
| 26S protease regulatory subunit 8                       | IPI00023919.4 | 7  |
| 26S protease regulatory subunit S10B                    | IPI00021926.2 | 12 |
| 26S proteasome non-ATPase regulatory subunit 2          | IPI00012268.2 | 4  |
| 26S proteasome non-ATPase regulatory subunit 5          | IPI00002134.3 | 14 |
| 29 kDa protein                                          | IPI00178083.2 | 11 |
| 3-ketoacyl-CoA thiolase, mitochondrial                  | IPI00001539.8 | 16 |
| 31 kDa protein                                          | IPI00374686.2 | 9  |
| 34 kDa protein                                          | IPI00412577.1 | 5  |
| 39 kDa protein                                          | IPI00334627.2 | 21 |
| 40S ribosomal protein S3                                | IPI00011253.2 | 32 |
| 40S ribosomal protein S4, X isoform                     | IPI00217030.9 | 29 |
| 40S ribosomal protein S6                                | IPI00021840.1 | 16 |
| 42 kDa protein                                          | IPI00164375.6 | 9  |
| 47 kDa heat shock protein precursor                     | IPI00019880.1 | 12 |
| 4F2 cell-surface antigen heavy chain                    | IPI00027493.1 | 11 |
| 50 kDa protein                                          | IPI00246022.3 | 7  |
| 53 kDa protein                                          | IPI00172579.3 | 7  |
| 6-phosphogluconate dehydrogenase, decarboxylating       | IPI00219525.9 | 15 |
| 60 kDa heat shock protein, mitochondrial precursor      | IPI00472102.2 | 47 |
| 60S acidic ribosomal protein P0                         | IPI00008530.1 | 44 |
| 60S ribosomal protein L18                               | IPI00215719.5 | 26 |
| 60S ribosomal protein L4                                | IPI00003918.4 | 13 |
| 72 kDa protein                                          | IPI00258514.3 | 2  |
| 78 kDa glucose-regulated protein precursor              | IPI00003362.1 | 33 |
| 93 kDa protein                                          | IPI00177366.2 | 4  |
| ADP/ATP translocase 2                                   | IPI00007188.4 | 12 |
| ATP synthase alpha chain, mitochondrial precursor       | IPI00440493.2 | 21 |
| ATP-citrate synthase                                    | IPI00021290.4 | 6  |
| ATP-dependent DNA helicase II 80 kDa subunit            | IPI00220834.7 | 3  |
| ATP-dependent RNA helicase DDX3X                        | IPI00215637.4 | 12 |
| Acetyl-CoA acetyltransferase, mitochondrial precursor   | IPI00030363.1 | 12 |
| Aconitate hydratase, mitochondrial precursor            | IPI00017855.1 | 4  |
| Actin, aortic smooth muscle                             | IPI00008603.1 | 16 |
| Actin, cytoplasmic 1                                    | IPI00021439.1 | 28 |
| Activator of 90 kDa heat shock protein ATPase homolog 1 | IPI00030706.1 | 7  |

|                                                             |                |    |
|-------------------------------------------------------------|----------------|----|
| Acyl-CoA dehydrogenase, medium-chain specific, mitochondria | IPI00005040.1  | 5  |
| Adenosylhomocysteinase                                      | IPI00012007.5  | 10 |
| Adenylyl cyclase-associated protein 1                       | IPI00008274.5  | 7  |
| Alcohol dehydrogenase                                       | IPI00220271.2  | 13 |
| Aldehyde dehydrogenase X, mitochondrial precursor           | IPI00103467.3  | 8  |
| Aldehyde dehydrogenase family 7 member A1                   | IPI00221234.4  | 5  |
| Aldehyde dehydrogenase, mitochondrial precursor             | IPI00006663.1  | 18 |
| Alpha subunit of GsGTP binding protein                      | IPI00030939.2  | 5  |
| Alpha-actinin-1                                             | IPI00013508.4  | 24 |
| Alpha-actinin-4                                             | IPI00013808.1  | 16 |
| Alpha-enolase                                               | IPI00465248.4  | 21 |
| Alpha-enolase, lung specific                                | IPI00013769.1  | 12 |
| Alpha-soluble NSF attachment protein                        | IPI00009253.1  | 14 |
| Annexin A5                                                  | IPI00329801.11 | 23 |
| Arginyl-tRNA synthetase                                     | IPI00004860.2  | 7  |
| Aspartate aminotransferase, mitochondrial precursor         | IPI00018206.3  | 21 |
| Bifunctional purine biosynthesis protein PURH               | IPI00289499.3  | 15 |
| C-1-tetrahydrofolate synthase, cytoplasmic                  | IPI00218342.9  | 13 |
| CDNA FLJ45525 fis, clone BRTHA2026311, highly similar to Pr | IPI00299571.4  | 19 |
| CDNA FLJ45706 fis, clone FEBRA2028457, highly similar to Nu | IPI00444262.1  | 4  |
| Calnexin precursor                                          | IPI00020984.1  | 12 |
| Calponin-3                                                  | IPI00216682.5  | 9  |
| Calreticulin precursor                                      | IPI00020599.1  | 6  |
| Carbonyl reductase [NADPH] 1                                | IPI00295386.6  | 8  |
| Carbonyl reductase [NADPH] 3                                | IPI00290462.4  | 11 |
| Cargo selection protein TIP47                               | IPI00106668.3  | 18 |
| Casein kinase II subunit alpha'                             | IPI00020602.1  | 6  |
| Chloride intracellular channel protein 1                    | IPI00010896.2  | 25 |
| Citrate synthase, mitochondrial precursor                   | IPI00025366.4  | 14 |
| Coatomer subunit beta                                       | IPI00295851.3  | 6  |
| Coproporphyrinogen III oxidase, mitochondrial precursor     | IPI00093057.6  | 5  |
| Cytokeratin type II                                         | IPI00005859.1  | 10 |
| D-3-phosphoglycerate dehydrogenase                          | IPI00011200.4  | 11 |
| DNA replication licensing factor MCM2                       | IPI00184330.5  | 7  |
| DNA replication licensing factor MCM4                       | IPI00018349.5  | 3  |
| Developmentally-regulated GTP-binding protein 1             | IPI00031836.3  | 7  |
| Developmentally-regulated GTP-binding protein 1             | IPI00031836.3  | 7  |
| Dihydrolipoyl dehydrogenase, mitochondrial precursor        | IPI00015911.1  | 8  |
| DnaJ homolog subfamily B member 1                           | IPI00015947.4  | 8  |
| Dolichyl-diphosphooligosaccharide--protein glycosyltransfer | IPI00025874.1  | 16 |
| Dolichyl-diphosphooligosaccharide-protein glycosyltransfera | IPI00297084.7  | 5  |
| Drebrin                                                     | IPI00003406.2  | 5  |
| EEF1A1 protein                                              | IPI00025447.6  | 15 |
| ELAV-like protein 1                                         | IPI00301936.3  | 11 |
| ENO1P protein                                               | IPI00328587.4  | 4  |

|                                                             |               |    |
|-------------------------------------------------------------|---------------|----|
| ERO1-like protein alpha precursor                           | IPI00386755.2 | 10 |
| Early endosome antigen 1                                    | IPI00329536.1 | 4  |
| Electron transfer flavoprotein alpha-subunit, mitochondrial | IPI00010810.1 | 11 |
| Elongation factor 1-alpha 2                                 | IPI00014424.1 | 12 |
| Elongation factor 1-beta                                    | IPI00178440.2 | 21 |
| Elongation factor 1-delta                                   | IPI00023048.3 | 13 |
| Elongation factor 1-gamma                                   | IPI00000875.5 | 11 |
| Elongation factor 2                                         | IPI00186290.5 | 18 |
| Elongation factor Tu, mitochondrial precursor               | IPI00027107.4 | 20 |
| Endoplasmic precursor                                       | IPI00027230.3 | 18 |
| Eukaryotic initiation factor 4A-I                           | IPI00025491.1 | 11 |
| Eukaryotic translation initiation factor 3 subunit 6        | IPI00013068.1 | 7  |
| Eukaryotic translation initiation factor 3 subunit 8        | IPI00016910.1 | 4  |
| Exportin-1                                                  | IPI00298961.3 | 3  |
| Exportin-1                                                  | IPI00298961.3 | 3  |
| FK506-binding protein 4                                     | IPI00219005.2 | 16 |
| Family with sequence similarity 62 (C2 domain containing),  | IPI00022143.3 | 3  |
| Far upstream element-binding protein 2                      | IPI00298363.2 | 12 |
| Fascin                                                      | IPI00163187.9 | 5  |
| Fatty acid synthase                                         | IPI00026781.2 | 7  |
| Filamin A, alpha                                            | IPI00302592.2 | 9  |
| Fructose-bisphosphate aldolase A                            | IPI00465439.4 | 36 |
| Fructose-bisphosphate aldolase C                            | IPI00418262.3 | 7  |
| Fumarate hydratase, mitochondrial precursor                 | IPI00296053.3 | 10 |
| G22P1 protein                                               | IPI00465430.4 | 9  |
| GARS protein                                                | IPI00465260.3 | 5  |
| GPI-anchored protein p137                                   | IPI00030910.1 | 7  |
| Glucose-6-phosphate isomerase                               | IPI00027497.4 | 15 |
| Glucosidase II beta subunit precursor                       | IPI00026154.1 | 4  |
| Glutamate dehydrogenase 1, mitochondrial precursor          | IPI00016801.1 | 8  |
| Glutathione reductase, mitochondrial precursor              | IPI00016862.1 | 6  |
| Glutathione synthetase                                      | IPI00010706.1 | 7  |
| Glyceraldehyde-3-phosphate dehydrogenase                    | IPI00219018.6 | 22 |
| Guanine nucleotide-binding protein G(I)/G(S)/G(T) beta subu | IPI00003348.2 | 7  |
| HLA class I histocompatibility antigen, A-1 alpha chain pre | IPI00026569.3 | 9  |
| HNRPF protein                                               | IPI00003881.5 | 20 |
| HSPC117 protein                                             | IPI00550689.3 | 6  |
| Heat shock 70 kDa protein 1                                 | IPI00304925.3 | 12 |
| Heat shock 70 kDa protein 1L                                | IPI00301277.1 | 9  |
| Heat shock 70 kDa protein 4                                 | IPI00002966.1 | 18 |
| Heat shock 70 kDa protein 4L                                | IPI00295485.1 | 6  |
| Heat shock protein 75 kDa, mitochondrial precursor          | IPI00030275.5 | 12 |
| Heat shock protein HSP 90-alpha 2                           | IPI00382470.2 | 10 |
| Heterogeneous nuclear ribonucleoprotein R                   | IPI00012074.3 | 4  |
| Histidyl-tRNA synthetase                                    | IPI00021808.3 | 5  |
| Histone-binding protein RBBP4                               | IPI00328319.7 | 5  |
| Hsc70-interacting protein                                   | IPI00032826.1 | 11 |

|                                                             |               |    |
|-------------------------------------------------------------|---------------|----|
| Hsp90 co-chaperone Cdc37                                    | IPI00013122.1 | 7  |
| Hypothetical protein DKFZp313B047                           | IPI00013452.8 | 3  |
| Hypothetical protein DKFZp686P03159                         | IPI00418169.1 | 5  |
| Hypothetical protein DKFZp761K0511                          | IPI00334775.5 | 21 |
| Hypothetical protein LRRC59                                 | IPI00396321.1 | 7  |
| IARS protein                                                | IPI00013234.2 | 3  |
| Importin alpha-2 subunit                                    | IPI00002214.1 | 8  |
| Importin beta-1 subunit                                     | IPI00001639.2 | 9  |
| Importin beta-2 subunit                                     | IPI00024364.2 | 4  |
| Importin beta-3                                             | IPI00329200.5 | 3  |
| Inorganic pyrophosphatase                                   | IPI00015018.1 | 9  |
| Inosine-5'-monophosphate dehydrogenase 2                    | IPI00291510.3 | 8  |
| Inosine-5'-monophosphate dehydrogenase 2                    | IPI00291510.3 | 8  |
| Interleukin enhancer-binding factor 2                       | IPI00005198.2 | 9  |
| Junction plakoglobin                                        | IPI00554711.1 | 4  |
| Keratin, type I cytoskeletal 10                             | IPI00009865.1 | 44 |
| Keratin, type I cytoskeletal 14                             | IPI00384444.4 | 23 |
| Keratin, type I cytoskeletal 16                             | IPI00217963.2 | 20 |
| Keratin, type I cytoskeletal 9                              | IPI00019359.3 | 46 |
| Keratin, type II cytoskeletal 1                             | IPI00220327.2 | 51 |
| Keratin, type II cytoskeletal 2 epidermal                   | IPI00021304.1 | 45 |
| Keratin, type II cytoskeletal 2 oral                        | IPI00008359.1 | 1  |
| Keratin, type II cytoskeletal 5                             | IPI00009867.2 | 21 |
| Keratin, type II cytoskeletal 6B                            | IPI00293665.6 | 9  |
| Kinesin heavy chain                                         | IPI00012837.1 | 9  |
| L-lactate dehydrogenase B chain                             | IPI00219217.2 | 34 |
| LAP3 protein                                                | IPI00419237.2 | 10 |
| Leucine zipper-EF-hand containing transmembrane protein 1,  | IPI00017592.1 | 6  |
| Leucyl-tRNA synthetase, cytoplasmic                         | IPI00103994.4 | 2  |
| Lon protease homolog, mitochondrial precursor               | IPI00005158.1 | 4  |
| Lupus La protein                                            | IPI00009032.1 | 12 |
| Lysyl-tRNA synthetase                                       | IPI00014238.2 | 5  |
| Malate dehydrogenase, cytoplasmic                           | IPI00291005.7 | 14 |
| Malate dehydrogenase, mitochondrial precursor               | IPI00291006.1 | 20 |
| Methionine adenosyltransferase II, beta, isoform 1          | IPI00002324.3 | 15 |
| Methionyl-tRNA synthetase                                   | IPI00008240.2 | 3  |
| Mitochondrial 28S ribosomal protein S29                     | IPI00018120.1 | 10 |
| Mitochondrial import receptor subunit TOM34                 | IPI00009946.4 | 11 |
| Mitochondrial-processing peptidase alpha subunit, mitochond | IPI00166749.3 | 5  |
| Mitotic checkpoint protein BUB3                             | IPI00013468.1 | 7  |
| Multifunctional protein ADE2                                | IPI00217223.1 | 10 |
| Myosin-9                                                    | IPI00019502.2 | 6  |
| NAD-dependent malic enzyme, mitochondrial precursor         | IPI00011201.1 | 4  |
| NADH-ubiquinone oxidoreductase 49 kDa subunit, mitochondria | IPI00025239.2 | 6  |
| NCL protein                                                 | IPI00183526.5 | 7  |

|                                                             |               |    |
|-------------------------------------------------------------|---------------|----|
| Neuroblast differentiation-associated protein AHNAK (Fragme | IPI00021812.1 | 3  |
| Niban-like protein                                          | IPI00456750.2 | 3  |
| Nuclear migration protein nudC                              | IPI00550746.4 | 8  |
| Nucleosome assembly protein 1-like 4                        | IPI00017763.3 | 7  |
| ORF protein                                                 | IPI00171903.1 | 7  |
| Ornithine aminotransferase, mitochondrial precursor         | IPI00022334.1 | 7  |
| PREDICTED: KIAA1765 protein                                 | IPI00028196.4 | 2  |
| PREDICTED: heat shock 90kDa protein 1, alpha-like 3         | IPI00031523.2 | 17 |
| PREDICTED: similar to 40S ribosomal protein SA              | IPI00398958.1 | 18 |
| PREDICTED: similar to ATP-dependent DNA helicase II, 70 kDa | IPI00412259.2 | 7  |
| PREDICTED: similar to Serine/threonine-protein kinase Nek4  | IPI00455635.1 | 14 |
| Peroxiredoxin-1                                             | IPI00000874.1 | 13 |
| Peroxiredoxin-6                                             | IPI00220301.4 | 44 |
| Phenylalanyl-tRNA synthetase beta chain                     | IPI00300074.3 | 4  |
| Phosphoglycerate kinase 1                                   | IPI00169383.2 | 37 |
| Phosphoribosylformylglycinamide synthase                    | IPI00004534.3 | 4  |
| Plastin-2                                                   | IPI00010471.3 | 23 |
| Poly(rC)-binding protein 1                                  | IPI00016610.2 | 15 |
| Probable ATP-dependent RNA helicase DDX5                    | IPI00017617.1 | 10 |
| Probable ATP-dependent RNA helicase DDX6                    | IPI00030320.3 | 5  |
| Profilin-1                                                  | IPI00216691.4 | 20 |
| Programmed cell death 6-interacting protein                 | IPI00246058.4 | 4  |
| Prohibitin                                                  | IPI00017334.1 | 28 |
| Prohibitin-2                                                | IPI00027252.6 | 8  |
| Proliferating cell nuclear antigen                          | IPI00021700.3 | 22 |
| Proliferation-associated protein 2G4                        | IPI00299000.3 | 16 |
| Proliferation-inducing gene 21                              | IPI00552496.1 | 38 |
| Proteasome 26S non-ATPase subunit 11 variant (Fragment)     | IPI00105598.3 | 9  |
| Proteasome activator complex subunit 1                      | IPI00030154.1 | 9  |
| Proteasome subunit alpha type 4                             | IPI00299155.5 | 7  |
| Protein disulfide-isomerase A3 precursor                    | IPI00025252.1 | 26 |
| Protein disulfide-isomerase A4 precursor                    | IPI00009904.1 | 16 |
| Protein disulfide-isomerase precursor                       | IPI00010796.1 | 21 |
| Purine nucleoside phosphorylase                             | IPI00017672.3 | 25 |
| Rab GDP dissociation inhibitor beta                         | IPI00031461.1 | 9  |
| Ras GTPase-activating-like protein IQGAP1                   | IPI00009342.1 | 5  |
| Ras-GTPase-activating protein binding protein 1             | IPI00012442.1 | 14 |
| RcTPI1 (Fragment)                                           | IPI00383071.1 | 11 |
| Ribonuclease inhibitor                                      | IPI00550069.2 | 6  |
| RuvB-like 1                                                 | IPI00021187.3 | 15 |
| RuvB-like 2                                                 | IPI00009104.6 | 10 |
| S-adenosylmethionine synthetase isoform type-2              | IPI00010157.1 | 7  |
| S-methyl-5-thioadenosine phosphorylase                      | IPI00011876.1 | 14 |
| Serine hydroxymethyltransferase, mitochondrial precursor    | IPI00002520.1 | 12 |
| Serine-threonine kinase receptor-associated protein         | IPI00294536.1 | 14 |

|                                                             |               |    |
|-------------------------------------------------------------|---------------|----|
| Signal recognition particle receptor beta subunit           | IPI00295098.3 | 24 |
| Similar to Clathrin heavy chain                             | IPI00024067.2 | 6  |
| Similar to Eukaryotic translation initiation factor 4GI     | IPI00220365.3 | 4  |
| Similar to heterogeneous nuclear ribonucleoprotein A1 isofo | IPI00042578.5 | 10 |
| Splice Isoform 1 of Acyl-CoA dehydrogenase, very-long-chain | IPI00028031.2 | 6  |
| Splice Isoform 1 of Clathrin heavy chain 2                  | IPI00022881.1 | 1  |
| Splice Isoform 1 of Cullin-associated NEDD8-dissociated pro | IPI00100160.3 | 5  |
| Splice Isoform 1 of DNA replication licensing factor MCM7   | IPI00299904.3 | 4  |
| Splice Isoform 1 of Elongation factor Ts, mitochondrial pre | IPI00021016.3 | 14 |
| Splice Isoform 1 of F-actin capping protein beta subunit    | IPI00026185.5 | 12 |
| Splice Isoform 1 of Filamin-B                               | IPI00289334.1 | 6  |
| Splice Isoform 1 of Filamin-C                               | IPI00178352.3 | 1  |
| Splice Isoform 1 of Heat shock cognate 71 kDa protein       | IPI00003865.1 | 36 |
| Splice Isoform 1 of Heterogeneous nuclear ribonucleoprotein | IPI00216049.1 | 25 |
| Splice Isoform 1 of Importin-alpha re-exporter              | IPI00022744.5 | 7  |
| Splice Isoform 1 of Isocitrate dehydrogenase [NAD] subunit  | IPI00030702.1 | 11 |
| Splice Isoform 1 of Keratin, type I cytoskeletal 13         | IPI00009866.6 | 7  |
| Splice Isoform 1 of Kinectin                                | IPI00328753.1 | 3  |
| Splice Isoform 1 of Mitochondrial inner membrane protein    | IPI00009960.6 | 5  |
| Splice Isoform 1 of Plectin 1                               | IPI00014898.1 | 1  |
| Splice Isoform 1 of Polyadenylate-binding protein 1         | IPI00008524.1 | 17 |
| Splice Isoform 1 of Probable ATP-dependent RNA helicase DDX | IPI00023785.5 | 7  |
| Splice Isoform 1 of Programmed cell death protein 8, mitoch | IPI00000690.1 | 6  |
| Splice Isoform 1 of Proteasome activator complex subunit 3  | IPI00030243.1 | 8  |
| Splice Isoform 1 of Protein KIAA1967                        | IPI00182757.9 | 4  |
| Splice Isoform 1 of Protein arginine N-methyltransferase 1  | IPI00018522.3 | 7  |
| Splice Isoform 1 of Serine hydroxymethyltransferase, cytos  | IPI00002519.1 | 3  |
| Splice Isoform 1 of Spectrin alpha chain, brain             | IPI00413728.2 | 2  |
| Splice Isoform 1 of Transcription intermediary factor 1-bet | IPI00438229.1 | 15 |
| Splice Isoform 1 of Uridine-cytidine kinase 2               | IPI00065671.1 | 10 |
| Splice Isoform 1 of Voltage-dependent anion-selective chann | IPI00031804.1 | 9  |
| Splice Isoform 2 of Microtubule-associated protein 4        | IPI00220113.1 | 3  |
| Splice Isoform 2 of Neutral alpha-glucosidase AB precursor  | IPI00011454.1 | 3  |
| Splice Isoform 3 of Ribosome-binding protein 1              | IPI00215743.2 | 3  |
| Splice Isoform 4 of Heterogeneous nuclear ribonucleoprotein | IPI00106509.2 | 7  |
| Splice Isoform 5 of Dynamin-1-like protein                  | IPI00037283.2 | 3  |
| Splice Isoform A of Phosphate carrier protein, mitochondria | IPI00022202.3 | 6  |
| Splice Isoform AGX2 of UDP-N-acetylhexosamine pyrophosphory | IPI00000684.4 | 11 |
| Splice Isoform Beta of Heat-shock protein 105 kDa           | IPI00218993.1 | 5  |
| Splice Isoform Beta-1C of Integrin beta-1 precursor         | IPI00217561.1 | 4  |
| Splice Isoform DUT-M of Deoxyuridine 5'-triphosphate nucleo | IPI00013679.1 | 10 |
| Splice Isoform GAC of Glutaminase kidney isoform, mitochond | IPI00215687.1 | 6  |

|                                                             |               |    |
|-------------------------------------------------------------|---------------|----|
| Splice Isoform Long of Delta 1-pyrroline-5-carboxylate synt | IPI00008982.1 | 13 |
| Splice Isoform Long of Double-stranded RNA-binding protein  | IPI00000001.1 | 5  |
| Splice Isoform Long of Heterogenous nuclear ribonucleoprote | IPI00025054.1 | 3  |
| Splice Isoform Long of Sodium/potassium-transporting ATPase | IPI00006482.1 | 3  |
| Splice Isoform Short of Proteasome subunit alpha type 1     | IPI00016832.1 | 10 |
| Spliceosome RNA helicase BAT1                               | IPI00328343.7 | 8  |
| Splicing factor 3B subunit 3                                | IPI00300371.3 | 3  |
| Staphylococcal nuclease domain-containing protein 1         | IPI00140420.4 | 10 |
| Stress-70 protein, mitochondrial precursor                  | IPI00007765.5 | 30 |
| Stress-induced-phosphoprotein 1                             | IPI00013894.1 | 10 |
| Succinyl-CoA:3-ketoacid-coenzyme A transferase 1, mitochond | IPI00026516.1 | 4  |
| Synaptic vesicle membrane protein VAT-1 homolog             | IPI00156689.3 | 8  |
| T-complex protein 1 subunit alpha                           | IPI00290566.1 | 11 |
| T-complex protein 1 subunit beta                            | IPI00297779.6 | 27 |
| T-complex protein 1 subunit delta                           | IPI00302927.5 | 12 |
| T-complex protein 1 subunit epsilon                         | IPI00010720.1 | 8  |
| T-complex protein 1 subunit eta                             | IPI00018465.1 | 18 |
| T-complex protein 1 subunit theta                           | IPI00302925.3 | 21 |
| T-complex protein 1 subunit zeta                            | IPI00027626.2 | 5  |
| TUBA6 protein                                               | IPI00166768.2 | 22 |
| Talin-1                                                     | IPI00298994.4 | 3  |
| Thioredoxin domain-containing protein 5 precursor           | IPI00171438.2 | 10 |
| Thioredoxin-dependent peroxide reductase, mitochondrial pre | IPI00024919.3 | 15 |
| Threonyl-tRNA synthetase, cytoplasmic                       | IPI00329633.5 | 3  |
| Transferrin receptor protein 1                              | IPI00022462.1 | 16 |
| Transketolase                                               | IPI00021716.1 | 13 |
| Translocated promoter region                                | IPI00022970.3 | 2  |
| Trifunctional enzyme alpha subunit, mitochondrial precursor | IPI00031522.2 | 13 |
| Trifunctional enzyme beta subunit, mitochondrial precursor  | IPI00022793.4 | 12 |
| Tubulin alpha-1 chain                                       | IPI00007750.1 | 33 |
| Tubulin beta-1 chain                                        | IPI00006510.1 | 4  |
| Tubulin beta-2 chain                                        | IPI00011654.2 | 13 |
| Tubulin beta-2C chain                                       | IPI00007752.1 | 46 |
| Tubulin--tyrosine ligase-like protein 12                    | IPI00029048.2 | 3  |
| Tubulin-specific chaperone B                                | IPI00293126.1 | 8  |
| Tyrosine-protein phosphatase non-receptor type 1            | IPI00297261.3 | 5  |
| Tyrosyl-tRNA synthetase, cytoplasmic                        | IPI00007074.4 | 10 |
| UDP-glucose 6-dehydrogenase                                 | IPI00031420.2 | 4  |
| Ubiquinol-cytochrome-c reductase complex core protein 2, mi | IPI00305383.1 | 17 |
| Ubiquinol-cytochrome-c reductase complex core protein I, mi | IPI00013847.3 | 6  |
| Ubiquitin-activating enzyme E1                              | IPI00026119.6 | 16 |
| Ubiquitin-activating enzyme E1                              | IPI00645078.1 | 6  |



|                                                 |               |    |
|-------------------------------------------------|---------------|----|
| WUGSC:H_RG054D04.1 protein                      | IPI00011457.1 | 10 |
| Zyxin                                           | IPI00020513.2 | 10 |
| chaperonin containing TCP1, subunit 3 isoform b | IPI00290770.3 | 17 |
| heterogeneous nuclear ribonucleoprotein H1      | IPI00013881.5 | 10 |
| lactate dehydrogenase A                         | IPI00217966.6 | 22 |
| poly(rC)-binding protein 2 isoform b            | IPI00012066.1 | 19 |
| pyrroline-5-carboxylate reductase 1 isoform 2   | IPI00376503.1 | 8  |
| pyruvate kinase 3 isoform 2                     | IPI00220644.6 | 47 |

*Peptide adduction with HNE and analogs.*

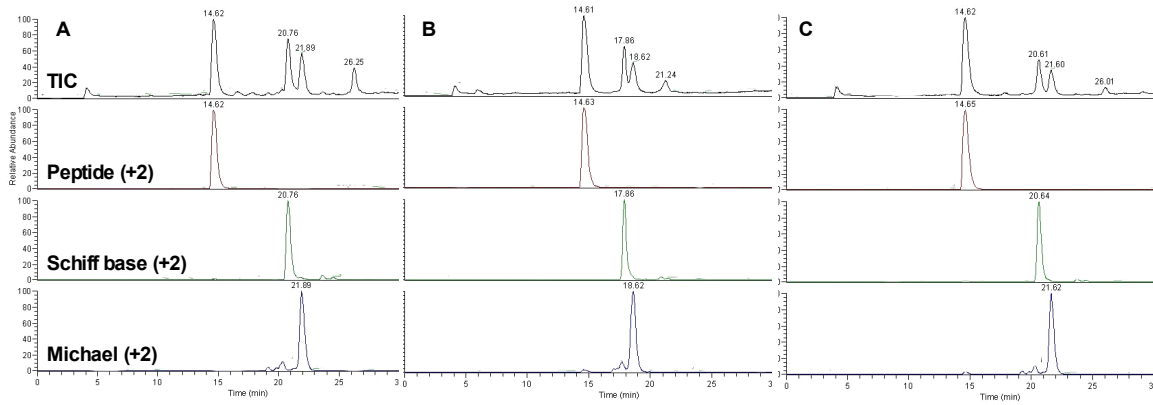

Figure S1. Incubation of Angiotensin (1 mM) with A) 5 mM HNE, B) 5 mM AI-HNE, or C) 5 mM Az-HNE. From top to bottom are the TIC, unreacted peptide, Schiff base, and Michael adducts. Samples were incubated at 37 °C for 1 h, reduced with NaBH<sub>4</sub> and analyzed by reverse-phase LC-MS.

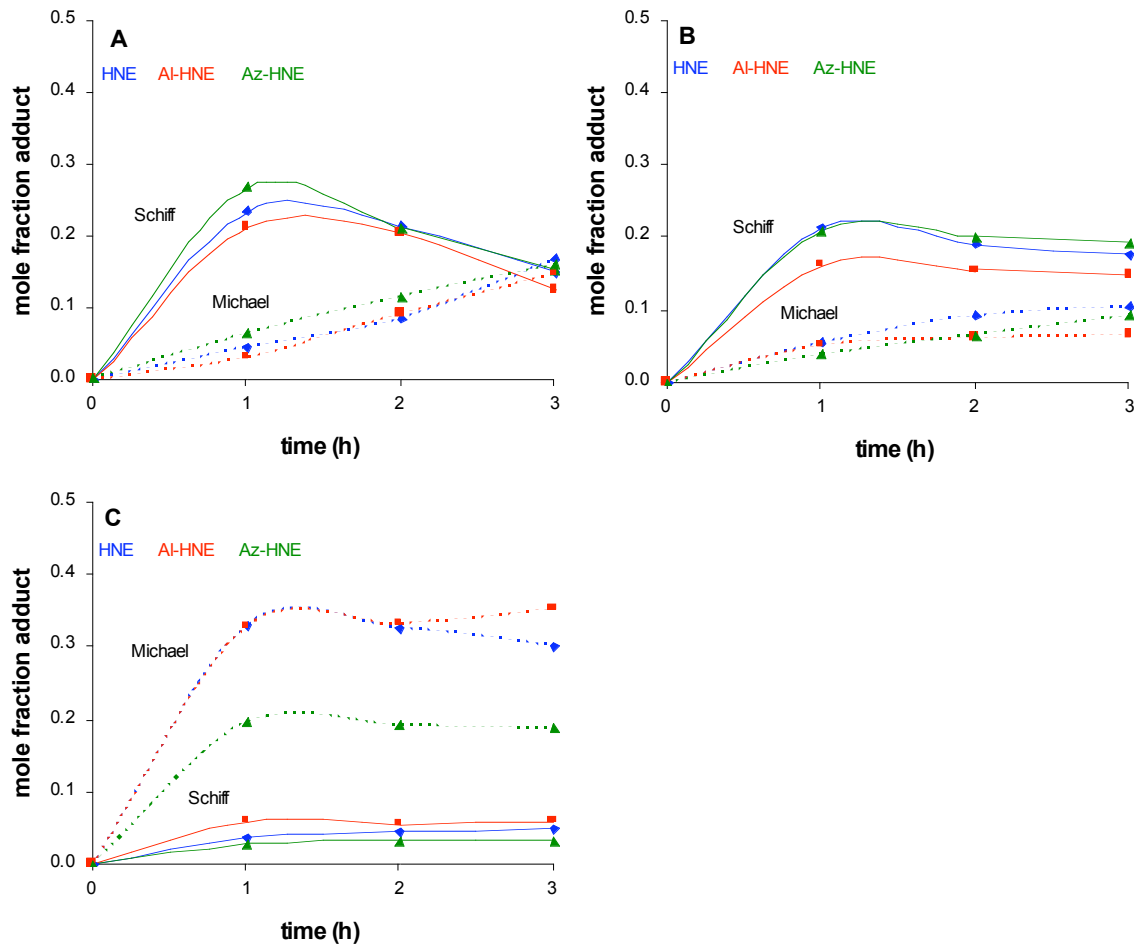

Figure S2. Incubation of A) Angiotensin (His), B) Gamma 2 factor (Lys) and C) ANP (Cys) with an equimolar mixture of **1-3**. HNE is shown in blue, AI-HNE in red and Az-HNE in green. Solid and dashed lines represent Schiff base and Michael adducts, respectively. Samples were incubated at 37 °C, reduced with NaBH<sub>4</sub> and analyzed by reverse-phase LC-MS.

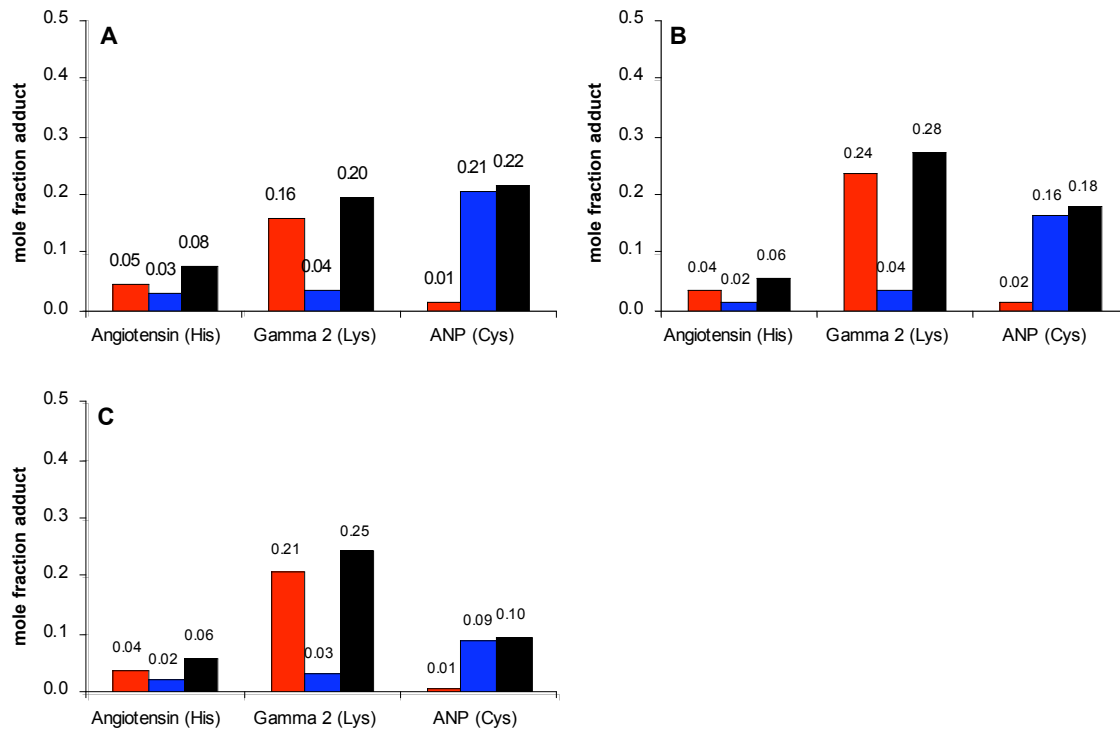

Figure S3. Incubation of an equimolar mixture of Angiotensin (His), Gamma 2 factor (Lys) and ANP (Cys) with A) HNE, B) Al-HNE and C) Az-HNE. Schiff base adducts are shown in red, Michael adducts in blue and total adduct formation in black. Samples were incubated at 37 °C for 1 h, reduced with NaBH<sub>4</sub> and analyzed by reverse-phase LC-MS.
